# Supplementary material
Source: Royal Society of Chemistry journal article supplement (doi:10.1039/d6tc00362a)
Supplement: d6tc00362a1.pdf [file d6tc00362a1.pdf]

## Supporting Information

### **Diarylboryl–Phenoselenazine Hybrid AIEgens: Design, Synthesis, and Multimodal Stimuli-Responsive Properties**

Yan Wang,<sup>a</sup> Zengheng Wen,<sup>a</sup> Zhuang Luo,<sup>a</sup> Runze Han,<sup>a</sup> Xingliang Liu<sup>a\*</sup> and Weidong Zhang<sup>a\*</sup>

<sup>a</sup>School of Chemical Engineering, Qinghai University, Xining, 810016, China;  
Correspondence: Weidong Zhang ([13772405930@163.com](mailto:13772405930@163.com))

#### **Contents**

|                                                                                   |    |
|-----------------------------------------------------------------------------------|----|
| 1. Materials and instrumentation .....                                            | 2  |
| 2. Experimental procedures and data.....                                          | 2  |
| 3. Single-crystal X-ray structure determination .....                             | 8  |
| 4. The excitation and emission spectra.....                                       | 18 |
| 5. The fluorescence lifetime decay spectra.....                                   | 19 |
| 6. The Experimental and the Calculated UV-Vis spectra.....                        | 20 |
| 7. Electrochemical properties .....                                               | 28 |
| 8. Comparison of HOMO/LUMO plots .....                                            | 29 |
| 9. Aggregation-induced fluorescence properties .....                              | 33 |
| 10. Determination of the detection limit.....                                     | 37 |
| 11. Electrochromism of 4a in solution and film applied potentials.....            | 38 |
| 12. Fluorescence spectral changes of 4a, 4d, and 4e film applied potentials. .... | 38 |
| 13. optical stability test for electrochromic switching of 4a, 4d, and 4e.....    | 39 |
| 14. <sup>1</sup> H NMR and <sup>13</sup> C NMR spectra.....                       | 40 |
| 15. HRMS spectra .....                                                            | 45 |
| 16. Reference .....                                                               | 48 |

## 1. Materials and instrumentation

**General.** All reactions were performed using standard Schlenk and glovebox (Vigor) techniques of SG1200/750TS-F system under argon atmosphere. Tetrahydrofuran and toluene were distilled from sodium/benzophenone prior to use. *n*-butyllithium (2.5 M, in hexane), fluorodimesitylborane (98%), bis(dibenzylideneacetone) palladium (Pd<sub>2</sub>dba<sub>3</sub>) (99%), and tetrakis(triphenylphosphine) palladium (Pd(Ph<sub>3</sub>P)<sub>4</sub>) (99%) were purchased from Energy Chemical Inc. Phenoselenazine and trimethyl(phenyl) stannane were prepared according to literature procedures<sup>[1,2]</sup>. Unless otherwise indicated, all other reagents and solvents were used as commercially available without further purification.

NMR spectra were measured on a Bruker Avance-600 spectrometer in the solvents indicated; chemical shifts are reported in units (ppm) by assigning TMS resonance in the <sup>1</sup>H spectrum as 7.26 ppm, CDCl<sub>3</sub> resonance in the <sup>13</sup>C spectrum as 77.0 ppm. Coupling constants are reported in Hz with multiplicities denoted as s (singlet), d (doublet), t (triplet), q (quartet) and m (multiplet). UV-vis measurements were performed using DH-2000-BAL Scan spectrophotometer. Fluorescence measurements were conducted on an FLS920 system and MicroTEQ-R1 system of ocean optics. Low-temperature environment was carried through Unistat905w model of equipment. Depressurization and remove the solvent were achieved using RV10 system of IKA. Single crystal X-ray diffraction analysis was carried out on a XtaLABSynergy-Dw instrument. The cyclic voltammetry (CV) was measured using a Metrohm PGSTAT204 set up.

## 2. Experimental procedures and data

### 2.1 Synthesis of 10-(dimesitylboraneyl)-10H-phenoselenazine (4a):

To a solution of phenoselenazine (1.23 g, 5.00 mmol) in THF (30 mL) at -78 °C was added dropwise a solution of *n*-BuLi (2.5 M in hexanes, 2.4 mL, 6.0 mmol) via syringe. After the reaction mixture was stirred for another 30 min at -78 °C, A solution of Mes<sub>2</sub>BF

(1.41 g, 5.27 mmol) in THF was then added dropwise at -78 °C, and the mixture was warmed to room temperature and stirred overnight. The solvent was removed under reduced pressure from the cloudy mixture and the product was extracted with 60 mL DCM, and the mixture was filtered through Celite. The solvent was removed from the filtrate, the crude product was subjected to purification by column chromatography (silica gel; petroleum ether/DCM, v/v = 20/1), affording a white solid. Yield: 2.25 g (91%). <sup>1</sup>H NMR (600 MHz, CDCl<sub>3</sub>): δ 7.40 (dd, 2H, *J* = 11.4 Hz, *J* = 1.8 Hz, *ArH*), 7.27 (d, 2H, *J* = 10.2 Hz, *ArH*), 6.98-6.89 (m, 4H, *ArH*), 6.65 (s, 4H, *ArH*), 2.41 (s, 12H, *CH*<sub>3</sub>), 2.18 (s, 6H, *CH*<sub>3</sub>); <sup>13</sup>C NMR (101 MHz, CDCl<sub>3</sub>): δ 143.79, 140.44, 136.83, 129.77, 128.00, 126.65, 126.50, 125.45, 24.82, 20.91. HRMS (APCI) *m/z*: [*M*] calcd for C<sub>30</sub>H<sub>30</sub>BNSe, 495.1636, found, 495.1634. Anal. Calcd. For C<sub>30</sub>H<sub>30</sub>BNSe: C, 72.89; H, 6.12; N, 2.83. Found: C, 72.81; H, 6.08; N, 2.79.

## 2.2 Synthesis of 10-(4-(dimesitylboraneyl)phenyl)-10H-phenoselenazine (4b):

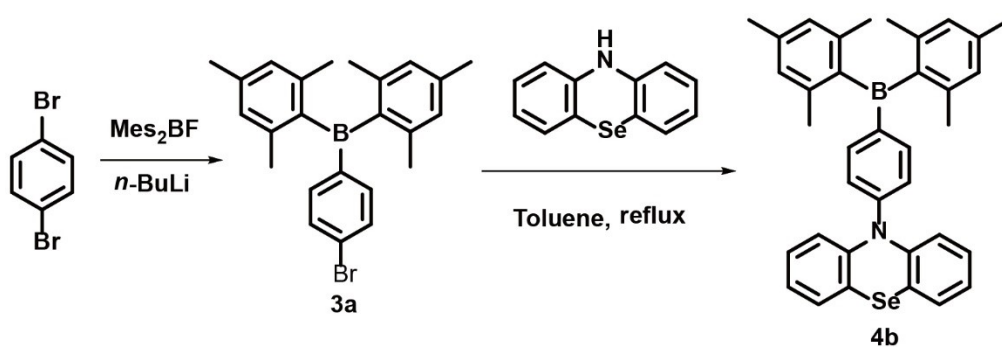

A solution of *para*-dibromobenzene (0.440 g, 1.864 mmol, 2 eq.) was prepared in anhydrous THF (10 mL) and cooled to -78 °C. To the cooled solution, 2.5 M *n*BuLi in hexanes (0.78 mL, 1.864 mmol, 2 eq.) was added dropwise over 20 minutes and the

solution was stirred at -78 °C for 1 hour. Dimesitylfluoroborane (0.250 g, 0.932 mmol, 1 eq.) was dissolved in anhydrous THF and transferred to an addition funnel before being added dropwise to the previous solution at -78 °C. The solution was stirred at -78 °C for 1 hour before being allowed to warm to room temperature while stirring overnight. Distilled water (5 mL) was added to quench the reaction and the mixture was extracted with CH<sub>2</sub>Cl<sub>2</sub>, washed with distilled water, and dried over sodium sulfate. The crude material was filtered before purification by column chromatography using hexanes as eluent. The product A was isolated as a white solid.

Under an inert atmosphere, a 250 mL Schlenk flask was charged with a 90 mL anhydrous toluene solution of **3a** (1.65 g, 4.08 mmol), phenoselenazine (1.01 g, 4.08 mmol), Pd<sub>2</sub>dba<sub>3</sub> (0.17 g, 0.12 mmol), tri-*tert*-butylphosphonium tetrafluoroborate (0.06 g, 0.204 mmol), and sodium *tert*-butoxide (0.78 g, 8.16 mmol). The flask was equipped with a reflux condenser and heated to reflux under nitrogen for 24 hours. The reaction was quenched with 10 mL of distilled water and extracted with dichloromethane. The organic layer was dried over sodium sulfate and purified by column chromatography using petroleum ether /DCM (5:1 v/v). The product was isolated as a bright yellow solid (1.61g, 69 % yield). <sup>1</sup>H NMR (600 MHz, CDCl<sub>3</sub>): δ 7.56 (d, 2H, *J* = 7.2 Hz, *ArH*), 7.43 (d, 2H, *J* = 7.8 Hz, *ArH*), 7.37 (d, 2H, *J* = 7.8 Hz, *ArH*), 7.30 (t, 2H, *J* = 7.2 Hz, *ArH*), 7.14 (t, 2H, *J* = 7.2 Hz, *ArH*), 6.91 (d, 2H, *J* = 7.8 Hz, *ArH*), 6.78 (s, 4H *ArH*), 2.28 (s, 6H, CH<sub>3</sub>), 2.03 (s, 12H, CH<sub>3</sub>); <sup>13</sup>C NMR (151 MHz, CDCl<sub>3</sub>) δ 148.70, 141.71, 140.69, 139.02, 137.98,

131.22, 130.16, 128.00, 127.49, 127.15, 126.02, 114.97, 23.49, 21.16. HRMS (APCI)  $m/z$ :  $[M + H]^+$  calcd for  $C_{36}H_{35}BNSe$ , 572.2027 found, 572.2017. Anal. Calcd. For  $C_{36}H_{34}BNSe$ : C, 75.80; H, 6.01; N, 2.46. Found: C, 75.73; H, 5.94; N, 2.43.

### 2.3 Synthesis of 10-(4'-(dimesitylboraneyl)-[1,1'-biphenyl]-4-yl)-10H-phenoselenazine (4c):

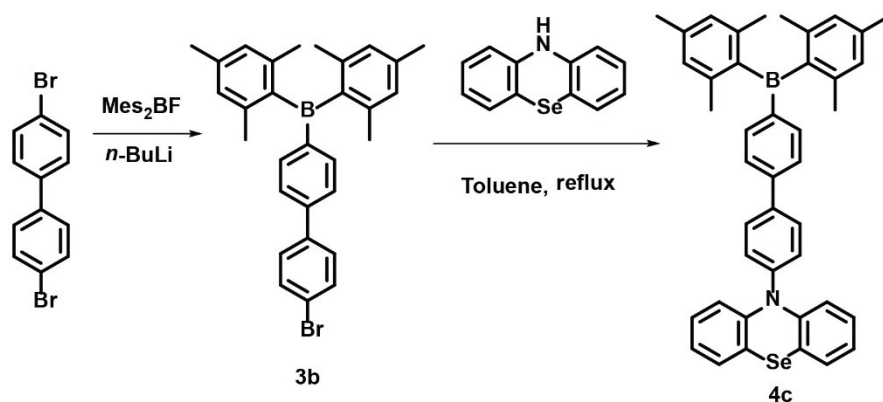

Compound **4c** was prepared following a procedure similar to that used for compound **4b**. The quantities involved and characterization data are as follows: **3b** (1.96 g, 4.08 mmol), **3a** (1.65 g, 4.08 mmol), phenoselenazine (1.01 g, 4.08 mmol),  $Pd_2dba_3$  (0.17 g, 0.12 mmol), tri-*tert*-butylphosphonium tetrafluoroborate (0.06 g, 0.204 mmol), and sodium *tert*-butoxide (0.78 g, 8.16 mmol). The crude product was subjected to purification by column chromatography (silica gel; petroleum ether/DCM, v/v = 5/1), affording a white solid. Yield: 1.9 g (72%).  $^1H$  NMR (600 MHz,  $CDCl_3$ ):  $\delta$  7.72 (d, 2H,  $J = 7.8$  Hz, ArH), 7.60 (s, 4H, ArH), 7.38 (d, 2H,  $J = 7.8$  Hz, ArH), 7.29 (d, 2H,  $J = 7.8$  Hz, ArH), 7.11 (t, 2H,  $J = 7.8$  Hz, ArH), 6.99 (t, 2H,  $J = 7.2$  Hz, ArH), 6.91 (d, 2H,  $J = 8.4$  Hz, ArH), 6.85 (s, 4H ArH), 2.33 (s, 6H,  $CH_3$ ), 2.05 (s, 12H,  $CH_3$ );  $^{13}C$  NMR (151 MHz,  $CDCl_3$ )  $\delta$  143.53,

143.47, 140.85, 138.64, 137.22, 137.18, 130.25, 128.67, 128.21, 127.41, 126.23, 124.92, 124.35, 122.47, 121.92, 23.50, 21.25. HRMS (APCI)  $m/z$ :  $[M + H]^+$  calcd for  $C_{42}H_{39}BNSe$ , 648.2340, found, 648.2334. Anal. Calcd. For  $C_{42}H_{38}BNSe$ : C, 78.02; H, 5.92; N, 2.17. Found: C, 77.96; H, 5.88; N, 2.08.

#### **2.4 Synthesis of 10-(dimesitylboraneyl)-3,7-diphenyl-10H-phenoselenazine (4d):**

$Pd_2dba_3$  (0.19g, 0.21mmol), tri(o-tolyl)phosphine (0.20g, 0.66mmol), compound **3** (2.61 g, 4.0 mmol) and trimethyl(phenyl) stannane (2.32 g, 9.6 mmol) were dissolved in 100 mL of toluene in a Schlenk flask. The mixture was refluxed in argon atmosphere for 12 h. After the removal of the solvent at a reduced pressure, the residue was purified by column chromatography on a silica gel column with petroleum ether/dichloromethane (3:1 by volume) to obtain a white solid (1.97 g, 76 %).  $^1H$  NMR (600 MHz,  $CDCl_3$ ):  $\delta$  7.66 (d, 2H,  $J = 1.2$  Hz, ArH), 7.50 (d, 4H,  $J = 7.8$  Hz, ArH), 7.38 (t, 4H,  $J = 7.2$  Hz, ArH), 7.32 (t, 4H,  $J = 7.2$  Hz, ArH), 7.16 (dd, 2H,  $J = 9.0$  Hz,  $J = 1.8$  Hz, ArH), 6.67 (s, 4H, ArH), 2.45 (s, 12H,  $CH_3$ ), 2.18 (s, 6H,  $CH_3$ );  $^{13}C$  NMR (101 MHz,  $CDCl_3$ ):  $\delta$  143.79, 143.09, 140.51, 140.45, 139.57, 138.27, 137.02, 136.84, 129.79, 128.77, 128.18, 128.12, 128.07, 128.02, 127.44, 126.86, 126.74, 126.67, 126.58, 126.51, 125.59, 125.48, 24.77, 20.97, 20.93. HRMS (APCI)  $m/z$ :  $[M]$  calcd for  $C_{42}H_{38}BNSe$ , 647.2262 found, 647.2251. Anal. Calcd. For  $C_{42}H_{38}BNSe$ : C, 78.02; H, 5.92; N, 2.17. Found: C, 77.98; H, 5.90; N, 2.14.

#### **2.5 Synthesis of 3,7-di([1,1'-biphenyl]-4-yl)-10-(dimesitylboraneyl)-10H-phenoselenazine (4e):**

Compound **4e** was prepared following a procedure similar to that used for compound **4d**. The quantities involved and characterization data are as follows: Pd<sub>2</sub>dba<sub>3</sub> (0.19g, 0.21mmol) , tri(o-tolyl)phosphine (0.20g, 0.66mmol) , compound **3** (2.61 g, 4.0 mmol) and [1,1'-biphenyl]-4-yltrimethylstannane (3.05 g, 9.6 mmol) in 100 mL of toluene. The crude product was purified by column chromatography on a silica gel column with petroleum ether/dichloromethane (3:1 by volume) to obtain a white solid (2.59 g, 81 %).

<sup>1</sup>H NMR (600 MHz, CDCl<sub>3</sub>): δ 7.73 (s, 2H, ArH), 7.61-7.58 (m, 12H, ArH), 7.45 (t, 4H, *J* = 7.2 Hz, ArH), 7.36 (d, 4H, *J* = 7.8 Hz, ArH), 7.21 (d, 2H, *J* = 8.4 Hz, ArH), 6.69 (s, 4H, ArH), 2.47 (s, 12H, CH<sub>3</sub>), 2.20 (s, 6H, CH<sub>3</sub>); <sup>13</sup>C NMR (101 MHz, CDCl<sub>3</sub>): δ 143.16, 140.61, 140.53, 140.28, 138.42, 137.73, 137.06, 128.86, 128.15, 128.04, 127.49, 127.43, 127.19, 127.05, 126.90, 126.64, 125.38, 24.79, 20.98. HRMS (APCI) *m/z*: [M] calcd for C<sub>54</sub>H<sub>46</sub>BNSe, 799.2888 found, 799.2900. Anal. Calcd. For C<sub>54</sub>H<sub>46</sub>BNSe: C, 81.20; H, 5.81; N, 1.75. Found: C, 81.13; H, 5.78; N, 1.71.

### 3. Single-crystal X-ray structure determination

X-ray Crystallography. All data were collected by a XtaLABSynergy-Dw CCD detector diffractometer using Mo/Cu K $\alpha$  radiation. The data were corrected for absorption through Gaussian integration from indexing of the crystal faces. Structures were solved using the direct methods programs SHELXS-97, and refinements were completed using the program SHELXL-97.

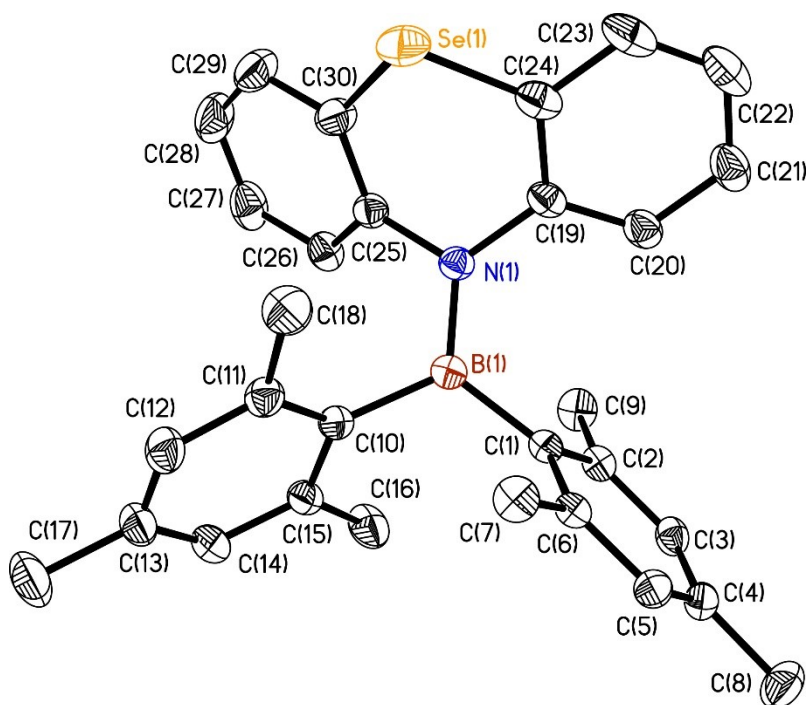

**Figure S1.** Molecular Structure of **4a** (CCDC 2488433) with thermal ellipsoids presented at a 50% probability level. All hydrogen atoms have been omitted for clarity. Selected bond lengths (Å): Se(1)-C(30), 1.893(2); C(19)-C(24), 1.402(3); Se(1)-C(24), 1.895(2); C(11)-C(12), 1.395(3); N(1)-C(19), 1.449(2); C(11)-C(18), 1.510(3); N(1)-C(25), 1.441(2); C(15)-C(14), 1.391(3); N(1)-B(1), 1.439(2); C(15)-C(16), 1.508(3). Bond angles (deg): C(30)-Se(1)-C(24), 93.81(9); C(14)-C(15)-C(16), 117.28(18); C(25)-N(1)-C(19), 114.85(14); C(26)-C(25)-N(1), 118.83(17); B(1)-N(1)-C(19), 125.97(15); C(30)-C(25)-N(1), 122.48(17); B(1)-N(1)-C(25), 119.18(14); C(30)-C(25)-C(26), 118.66(18), C(1)-B(1)-C(10), 117.78(15).

**Table S1.** Crystallographic experimental details for compound **4a** (CCDC 2488433).

|                                             |                                                               |
|---------------------------------------------|---------------------------------------------------------------|
| Identification code                         | <b>4a</b>                                                     |
| Empirical formula                           | C <sub>30</sub> H <sub>30</sub> BNSe                          |
| Formula weight                              | 494.32                                                        |
| Temperature/K                               | 301.38(10)                                                    |
| Crystal system                              | monoclinic                                                    |
| Space group                                 | C2/c                                                          |
| a/Å                                         | 13.8116(2)                                                    |
| b/Å                                         | 19.9217(3)                                                    |
| c/Å                                         | 18.5525(3)                                                    |
| α/°                                         | 90                                                            |
| β/°                                         | 96.064(2)                                                     |
| γ/°                                         | 90                                                            |
| Volume/Å <sup>3</sup>                       | 5076.17(14)                                                   |
| Z                                           | 8                                                             |
| ρ <sub>calc</sub> /cm <sup>3</sup>          | 1.294                                                         |
| μ/mm <sup>-1</sup>                          | 2.117                                                         |
| F(000)                                      | 2048.0                                                        |
| Crystal size/mm <sup>3</sup>                | 0.12 × 0.11 × 0.1                                             |
| Radiation                                   | Cu Kα (λ = 1.54184)                                           |
| 2θ range for data collection/°              | 7.818 to 153.788                                              |
| Index ranges                                | -17 ≤ h ≤ 13, -24 ≤ k ≤ 22, -23 ≤ l ≤ 23                      |
| Reflections collected                       | 18077                                                         |
| Independent reflections                     | 5091 [R <sub>int</sub> = 0.0204, R <sub>sigma</sub> = 0.0181] |
| Data/restraints/parameters                  | 5091/0/304                                                    |
| Goodness-of-fit on F <sup>2</sup>           | 1.067                                                         |
| Final R indexes [I ≥ 2σ (I)]                | R1 = 0.0417, wR2 = 0.1211                                     |
| Final R indexes [all data]                  | R1 = 0.0448, wR2 = 0.1242                                     |
| Largest diff. peak/hole / e Å <sup>-3</sup> | 0.59/-0.91                                                    |

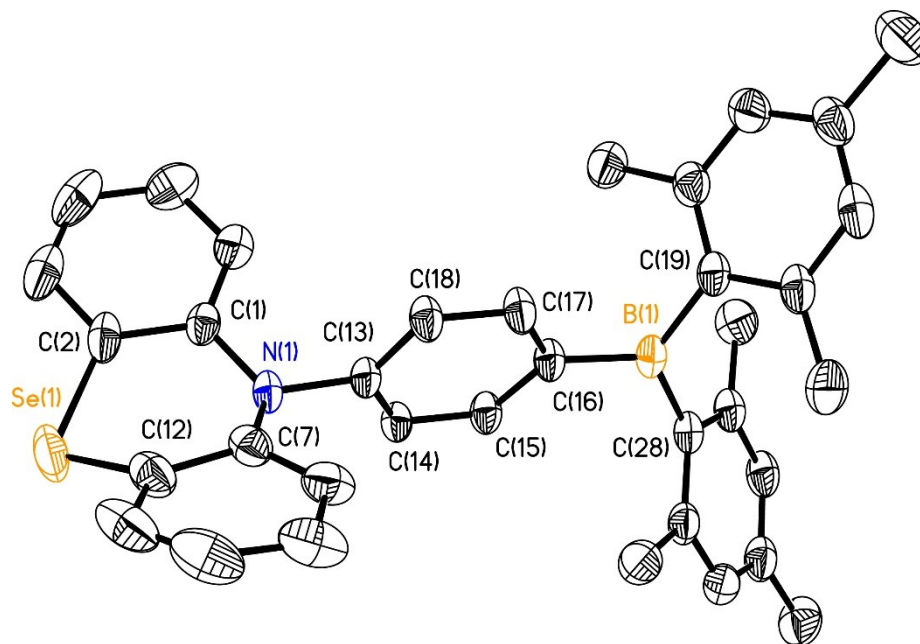

**Figure S2.** Molecular Structure of **4b** (CCDC 2463488) with thermal ellipsoids presented at a 50% probability level. All hydrogen atoms have been omitted for clarity. Selected bond lengths (Å): Se(1)-C(2), 1.900(5); C(17)-C(18), 1.397(6); Se(1)-C(12), 1.903(6); C(19)-C(20), 1.416(7); N(1)-C(1), 1.420(5); C(19)-C(24), 1.400(7); N(1)-C(7), 1.420(6); C(19)-B(1), 1.579(7); N(1)-C(13), 1.451(4); C(20)-C(21), 1.394(8); C(1)-C(2), 1.403(5); C(20)-C(27), 1.498(8); C(1)-C(6), 1.377(6); C(21)-C(22), 1.358(9). Bond angles (deg): C(2)-Se(1)-C(12), 95.2(2); C(1)-N(1)-C(13), 116.0(3); C(20)-C(19)-B(1), 120.2(4); C(7)-N(1)-C(1), 122.4(3); C(7)-N(1)-C(13), 116.0(3); C(24)-C(19)-B(1), 121.7(4); C(2)-C(1)-N(1), 121.0(4); C(6)-C(1)-N(1), 121.9(3); C(1)-C(2)-Se(1), 120.1(3); C(22)-C(21)-C(20), 123.4(5); C(3)-C(2)-Se(1), 118.5(4); C(12)-C(7)-N(1), 120.7(4); C(8)-C(7)-N(1), 122.8(5); C(29)-C(28)-B(1), 120.5(4); C(8A)-C(7)-N(1), 121.6(8); C(33)-C(28)-B(1), 121.5(4); C(8A)-C(7)-C(12), 116.5(9); C(7)-C(12)-Se(1), 120.1(4);

**Table S2.** Crystallographic experimental details for compound **4b** (CCDC 2463488).

|                                             |                                                               |
|---------------------------------------------|---------------------------------------------------------------|
| Empirical formula                           | C <sub>36</sub> H <sub>34</sub> BNSe                          |
| Formula weight                              | 570.41                                                        |
| Temperature/K                               | 301.15                                                        |
| Crystal system                              | monoclinic                                                    |
| Space group                                 | P2 <sub>1</sub>                                               |
| a/Å                                         | 8.9114(2)                                                     |
| b/Å                                         | 9.6033(3)                                                     |
| c/Å                                         | 17.7481(4)                                                    |
| α/°                                         | 90                                                            |
| β/°                                         | 103.300(2)                                                    |
| γ/°                                         | 90                                                            |
| Volume/Å <sup>3</sup>                       | 1478.12(7)                                                    |
| Z                                           | 2                                                             |
| ρ <sub>calc</sub> /cm <sup>3</sup>          | 1.282                                                         |
| μ/mm <sup>-1</sup>                          | 1.891                                                         |
| F(000)                                      | 592.0                                                         |
| Crystal size/mm <sup>3</sup>                | 0.15 × 0.12 × 0.1                                             |
| Radiation                                   | Cu Kα (λ = 1.54184)                                           |
| 2θ range for data collection/°              | 5.116 to 153.644                                              |
| Index ranges                                | -8 ≤ h ≤ 11, -9 ≤ k ≤ 11, -22 ≤ l ≤ 21                        |
| Reflections collected                       | 10777                                                         |
| Independent reflections                     | 5018 [R <sub>int</sub> = 0.0322, R <sub>sigma</sub> = 0.0396] |
| Data/restraints/parameters                  | 5018/138/395                                                  |
| Goodness-of-fit on F <sup>2</sup>           | 1.055                                                         |
| Final R indexes [I ≥ 2σ (I)]                | R <sub>1</sub> = 0.0452, wR <sub>2</sub> = 0.1207             |
| Final R indexes [all data]                  | R <sub>1</sub> = 0.0511, wR <sub>2</sub> = 0.1259             |
| Largest diff. peak/hole / e Å <sup>-3</sup> | 0.77/-0.50                                                    |
| Flack parameter                             | -0.008(13)                                                    |

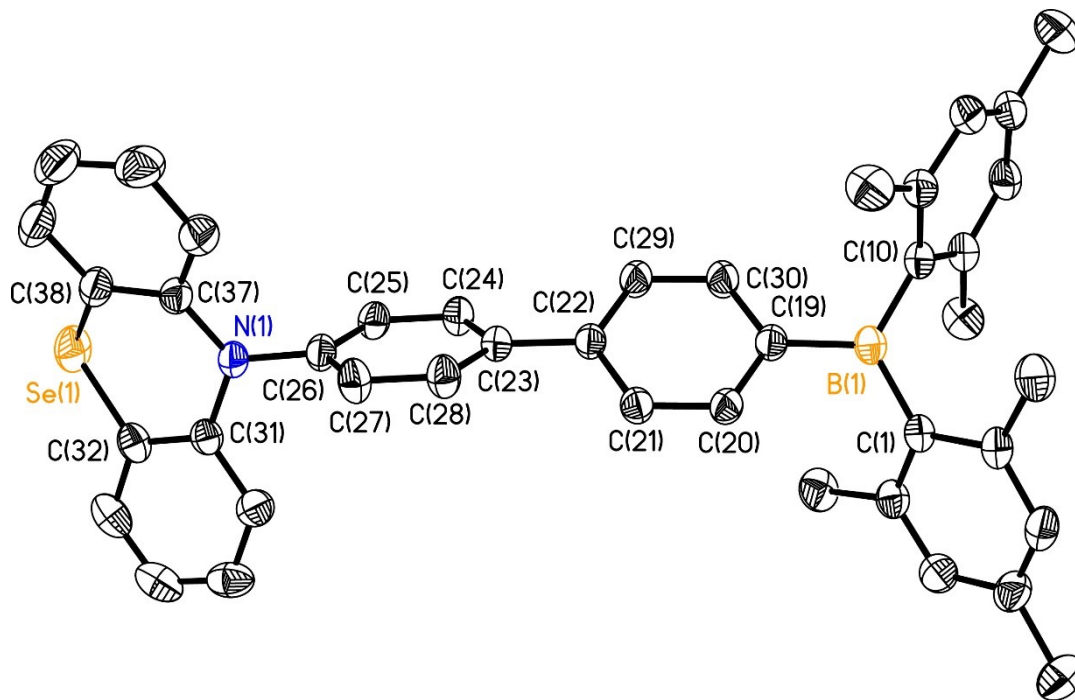

**Figure S3.** Molecular Structure of 4c (CCDC 2463490) with thermal ellipsoids presented at a 50% probability level. All hydrogen atoms have been omitted for clarity. Selected bond lengths (Å): Se(1)-C(38), 1.899(2); Se(1)-C(32), 1.895(2); N(1)-C(37), 1.413(2); N(1)-C(26), 1.435(2); N(1)-C(31), 1.418(2); C(10)-B(1), 1.575(3); C(19)-C(20), 1.394(2); C(19)-C(30), 1.398(3); C(19)-B(1), 1.563(2); C(1)-B(1), 1.577(3). Bond angles (deg): C(32)-Se(1)-C(38), 95.68(8); C(37)-N(1)-C(26), 117.95(15); C(37)-N(1)-C(31), 123.53(15); C(31)-N(1)-C(26), 116.84(14); C(11)-C(10)-B(1), 121.34(15); C(15)-C(10)-B(1), 120.77(16); C(20)-C(19)-C(30), 116.45(16); C(20)-C(19)-B(1), 122.29(15); C(30)-C(19)-B(1), 121.23(16); C(38)-C(37)-N(1), 121.20(19); C(42)-C(37)-N(1), 121.12(18); C(42)-C(37)-C(38), 117.63(19); C(2)-C(1)-B(1), 120.82(16); C(6)-C(1)-C(2), 117.31(17); C(6)-C(1)-B(1), 121.85(15); C(25)-C(26)-N(1), 118.76(16).

**Table S3.** Crystallographic experimental details for compound **4c** (CCDC 2463490).

|                                             |                                                               |
|---------------------------------------------|---------------------------------------------------------------|
| Identification code                         | 4c                                                            |
| Empirical formula                           | C <sub>42</sub> H <sub>38</sub> BNSe                          |
| Formula weight                              | 646.50                                                        |
| Temperature/K                               | 301.15                                                        |
| Crystal system                              | monoclinic                                                    |
| Space group                                 | P2 <sub>1</sub> /c                                            |
| a/Å                                         | 17.6929(3)                                                    |
| b/Å                                         | 9.60560(10)                                                   |
| c/Å                                         | 21.6101(4)                                                    |
| α/°                                         | 90                                                            |
| β/°                                         | 109.558(2)                                                    |
| γ/°                                         | 90                                                            |
| Volume/Å <sup>3</sup>                       | 3460.75(10)                                                   |
| Z                                           | 4                                                             |
| ρ <sub>calc</sub> /cm <sup>3</sup>          | 1.241                                                         |
| μ/mm <sup>-1</sup>                          | 1.678                                                         |
| F(000)                                      | 1344.0                                                        |
| Crystal size/mm <sup>3</sup>                | 0.15 × 0.12 × 0.1                                             |
| Radiation                                   | Cu Kα (λ = 1.54184)                                           |
| 2θ range for data collection/°              | 5.3 to 153.556                                                |
| Index ranges                                | -22 ≤ h ≤ 17, -9 ≤ k ≤ 11, -27 ≤ l ≤ 26                       |
| Reflections collected                       | 26271                                                         |
| Independent reflections                     | 7014 [R <sub>int</sub> = 0.0273, R <sub>sigma</sub> = 0.0251] |
| Data/restraints/parameters                  | 7014/0/412                                                    |
| Goodness-of-fit on F <sup>2</sup>           | 1.039                                                         |
| Final R indexes [I ≥ 2σ (I)]                | R <sub>1</sub> = 0.0389, wR <sub>2</sub> = 0.1117             |
| Final R indexes [all data]                  | R <sub>1</sub> = 0.0466, wR <sub>2</sub> = 0.1180             |
| Largest diff. peak/hole / e Å <sup>-3</sup> | 0.39/-0.56                                                    |

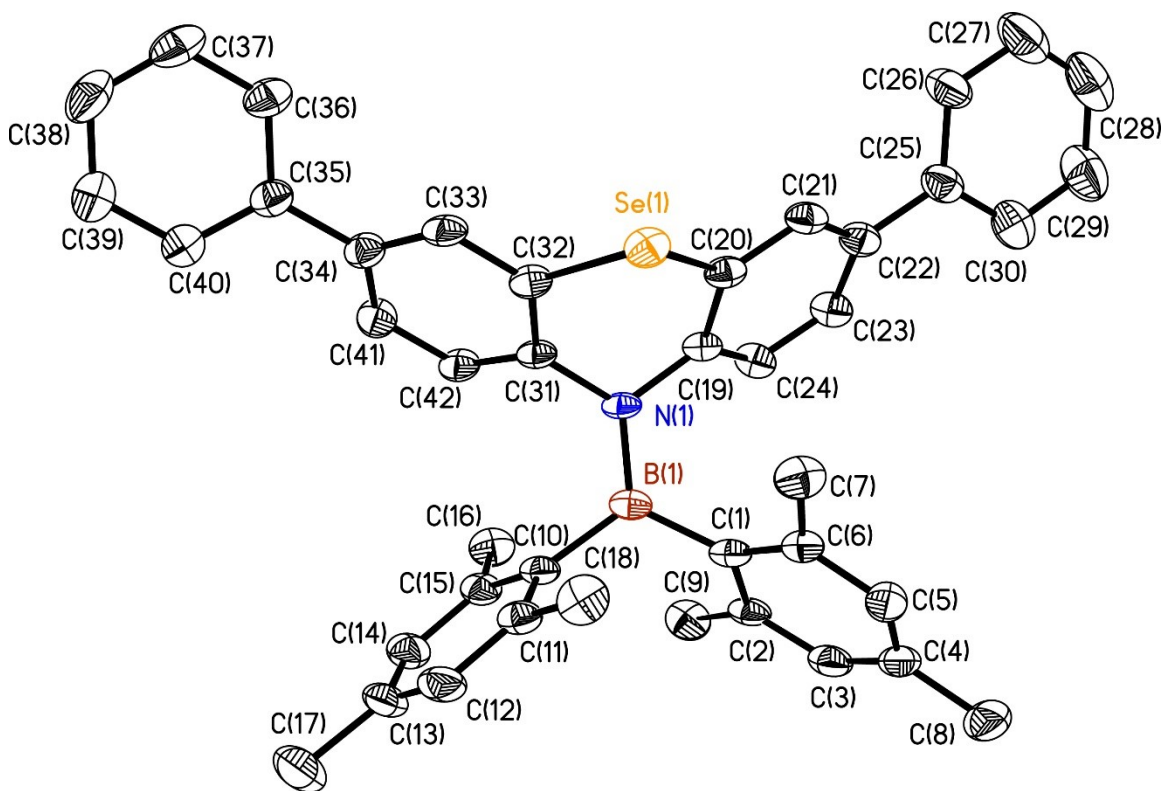

**Figure S4.** Molecular Structure of **4d** (CCDC 2488434) with thermal ellipsoids presented at a 50% probability level. All hydrogen atoms have been omitted for clarity. Selected bond lengths (Å): Se(1)-C(32), 1.899(6); Se(1)-C(20), 1.893(6); N(1)-C(31), 1.438(7); N(1)-C(19), 1.454(7); N(1)-B(1), 1.424(7); C(31)-C(32), 1.424(8); C(31)-C(42), 1.382(8); C(1)-C(2), 1.434(8); C(1)-C(6), 1.406(9); C(1)-B(1), 1.593(9). Bond angles (deg): C(20)-Se(1)-C(32), 93.9(3); C(31)-N(1)-C(19), 113.6(4); B(1)-N(1)-C(31), 125.9(5); B(1)-N(1)-C(19), 120.4(5); C(32)-C(31)-N(1), 120.8(5); C(42)-C(31)-N(1), 123.0(5); C(42)-C(31)-C(32), 116.1(5); C(2)-C(1)-B(1), 119.6(6); C(6)-C(1)-C(2), 116.1(6); C(6)-C(1)-B(1), 124.1(5); C(31)-C(32)-Se(1), 118.9(4); C(33)-C(32)-Se(1), 120.2(4); C(33)-C(32)-C(31), 120.9(6); C(20)-C(19)-N(1), 119.7(5); C(24)-C(19)-N(1), 120.7(5); C(11)-C(10)-C(15), 117.4(6); N(1)-B(1)-C(1), 121.1(5); C(11)-C(10)-B(1), 117.6(6); N(1)-B(1)-C(10), 120.1(5); C(15)-C(10)-B(1), 125.0(5); C(1)-B(1)-C(10), 118.3(5).

**Table S4.** Crystallographic experimental details for compound **4d** (CCDC 2488 434).

|                                             |                                                               |
|---------------------------------------------|---------------------------------------------------------------|
| Identification code                         | 4d                                                            |
| Empirical formula                           | C <sub>42</sub> H <sub>38</sub> BNSe                          |
| Formula weight                              | 646.50                                                        |
| Temperature/K                               | 301.15                                                        |
| Crystal system                              | Monoclinic                                                    |
| Space group                                 | P2 <sub>1</sub> /c                                            |
| a/Å                                         | 27.5084(7)                                                    |
| b/Å                                         | 15.1711(3)                                                    |
| c/Å                                         | 8.0954(2)                                                     |
| α/°                                         | 90                                                            |
| β/°                                         | 91.828(2)                                                     |
| γ/°                                         | 90                                                            |
| Volume/Å <sup>3</sup>                       | 3376.76(14)                                                   |
| Z                                           | 4                                                             |
| ρ <sub>calc</sub> /cm <sup>3</sup>          | 1.272                                                         |
| μ/mm <sup>-1</sup>                          | 1.719                                                         |
| F(000)                                      | 1344.0                                                        |
| Crystal size/mm <sup>3</sup>                | 0.12 × 0.11 × 0.1                                             |
| Radiation                                   | CuKα (λ = 1.54184)                                            |
| 2θ range for data collection/°              | 6.43 to 154.282                                               |
| Index ranges                                | -34 ≤ h ≤ 34, -19 ≤ k ≤ 7, -9 ≤ l ≤ 10                        |
| Reflections collected                       | 23779                                                         |
| Independent reflections                     | 6817 [R <sub>int</sub> = 0.1202, R <sub>sigma</sub> = 0.0664] |
| Data/restraints/parameters                  | 6817/0/413                                                    |
| Goodness-of-fit on F <sup>2</sup>           | 1.116                                                         |
| Final R indexes [I ≥ 2σ (I)]                | R <sub>1</sub> = 0.1048, wR <sub>2</sub> = 0.2709             |
| Final R indexes [all data]                  | R <sub>1</sub> = 0.1243, wR <sub>2</sub> = 0.2790             |
| Largest diff. peak/hole / e Å <sup>-3</sup> | 1.12/-0.83                                                    |

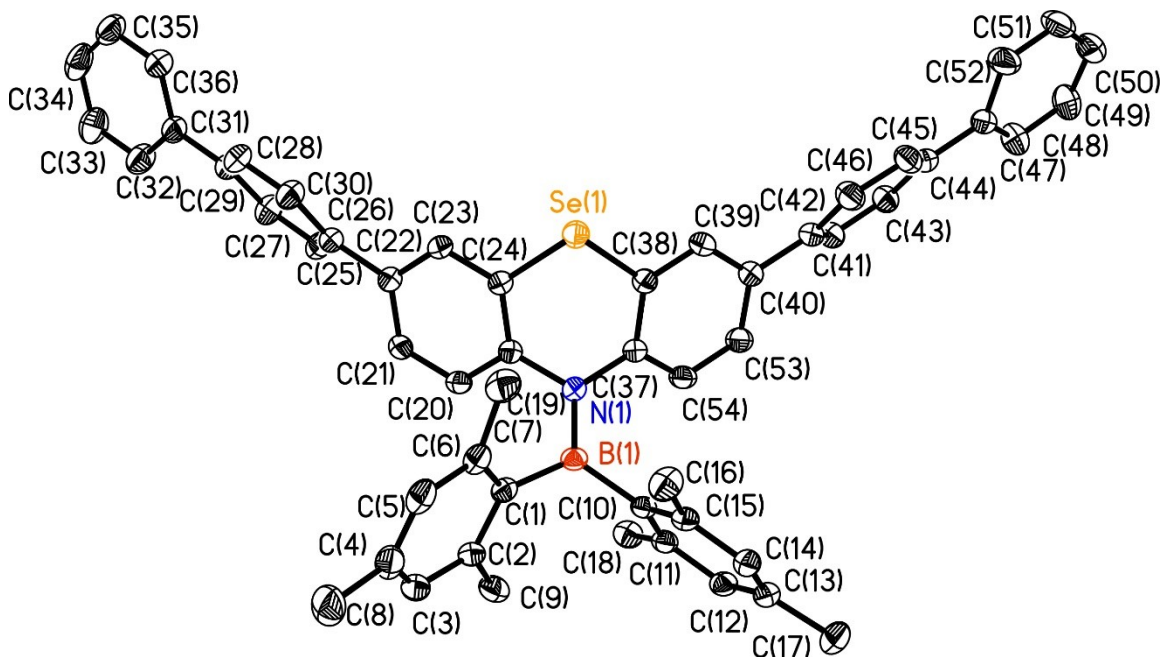

**Figure S5.** Molecular Structure of **4e** (CCDC 2488435) with thermal ellipsoids presented at a 50% probability level. All hydrogen atoms have been omitted for clarity. Selected bond lengths (Å): Se(1)-C(24), 1.908(3); Se(1)-C(38), 1.911(4); N(1)-C(19), 1.441(4); N(1)-C(37), 1.449(4); N(1)-B(1), 1.433(5); C(20)-C(19), 1.386(5); C(20)-C(21), 1.379(5); C(10)-C(11), 1.412(5); C(10)-C(15), 1.404(5); C(10)-B(1), 1.599(5). Bond angles (deg): C(24)-Se(1)-C(38), 92.89(15); C(19)-N(1)-C(37), 113.3(3); B(1)-N(1)-C(19), 121.1(3); B(1)-N(1)-C(37), 125.7(3); C(21)-C(20)-C(19), 121.0(3); C(11)-C(10)-B(1), 123.1(3); C(15)-C(10)-C(11), 117.5(3); C(15)-C(10)-B(1), 119.3(3); C(20)-C(19)-N(1), 119.9(3); C(20)-C(19)-C(24), 118.2(3); C(24)-C(19)-N(1), 121.8(3); C(19)-C(24)-Se(1), 118.9(3); C(19)-C(24)-C(23), 121.0(3); C(23)-C(24)-Se(1), 120.0(2); C(2)-C(1)-C(6), 116.6(3); C(2)-C(1)-B(1), 121.9(3); C(6)-C(1)-B(1), 120.9(3); C(10)-B(1)-C(1), 118.0(3).

**Table S5.** Crystallographic experimental details for compound **4e** (CCDC 2488435).

|                                             |                                                               |
|---------------------------------------------|---------------------------------------------------------------|
| Identification code                         | 4e                                                            |
| Empirical formula                           | C <sub>54</sub> H <sub>46</sub> BNSe                          |
| Formula weight                              | 798.69                                                        |
| Temperature/K                               | 301.37(10)                                                    |
| Crystal system                              | Orthorhombic                                                  |
| Space group                                 | P2 <sub>1</sub> 2 <sub>1</sub> 2 <sub>1</sub>                 |
| a/Å                                         | 10.6317(2)                                                    |
| b/Å                                         | 12.3024(3)                                                    |
| c/Å                                         | 32.1027(6)                                                    |
| α/°                                         | 90                                                            |
| β/°                                         | 90                                                            |
| γ/°                                         | 90                                                            |
| Volume/Å <sup>3</sup>                       | 4198.89(15)                                                   |
| Z                                           | 4                                                             |
| ρ <sub>calc</sub> /cm <sup>3</sup>          | 1.263                                                         |
| μ/mm <sup>-1</sup>                          | 1.486                                                         |
| F(000)                                      | 1664.0                                                        |
| Crystal size/mm <sup>3</sup>                | 0.13 × 0.12 × 0.1                                             |
| Radiation                                   | Cu Kα (λ = 1.54184)                                           |
| 2θ range for data collection/°              | 5.506 to 153.812                                              |
| Index ranges                                | -12 ≤ h ≤ 6, -15 ≤ k ≤ 15, -40 ≤ l ≤ 33                       |
| Reflections collected                       | 17027                                                         |
| Independent reflections                     | 7732 [R <sub>int</sub> = 0.0396, R <sub>sigma</sub> = 0.0437] |
| Data/restraints/parameters                  | 7732/63/539                                                   |
| Goodness-of-fit on F <sup>2</sup>           | 1.024                                                         |
| Final R indexes [I ≥ 2σ (I)]                | R <sub>1</sub> = 0.0389, wR <sub>2</sub> = 0.0960             |
| Final R indexes [all data]                  | R <sub>1</sub> = 0.0481, wR <sub>2</sub> = 0.1013             |
| Largest diff. peak/hole / e Å <sup>-3</sup> | 0.28/-0.37                                                    |
| Flack parameter                             | -0.011(12)                                                    |

#### 4. The excitation and emission spectra

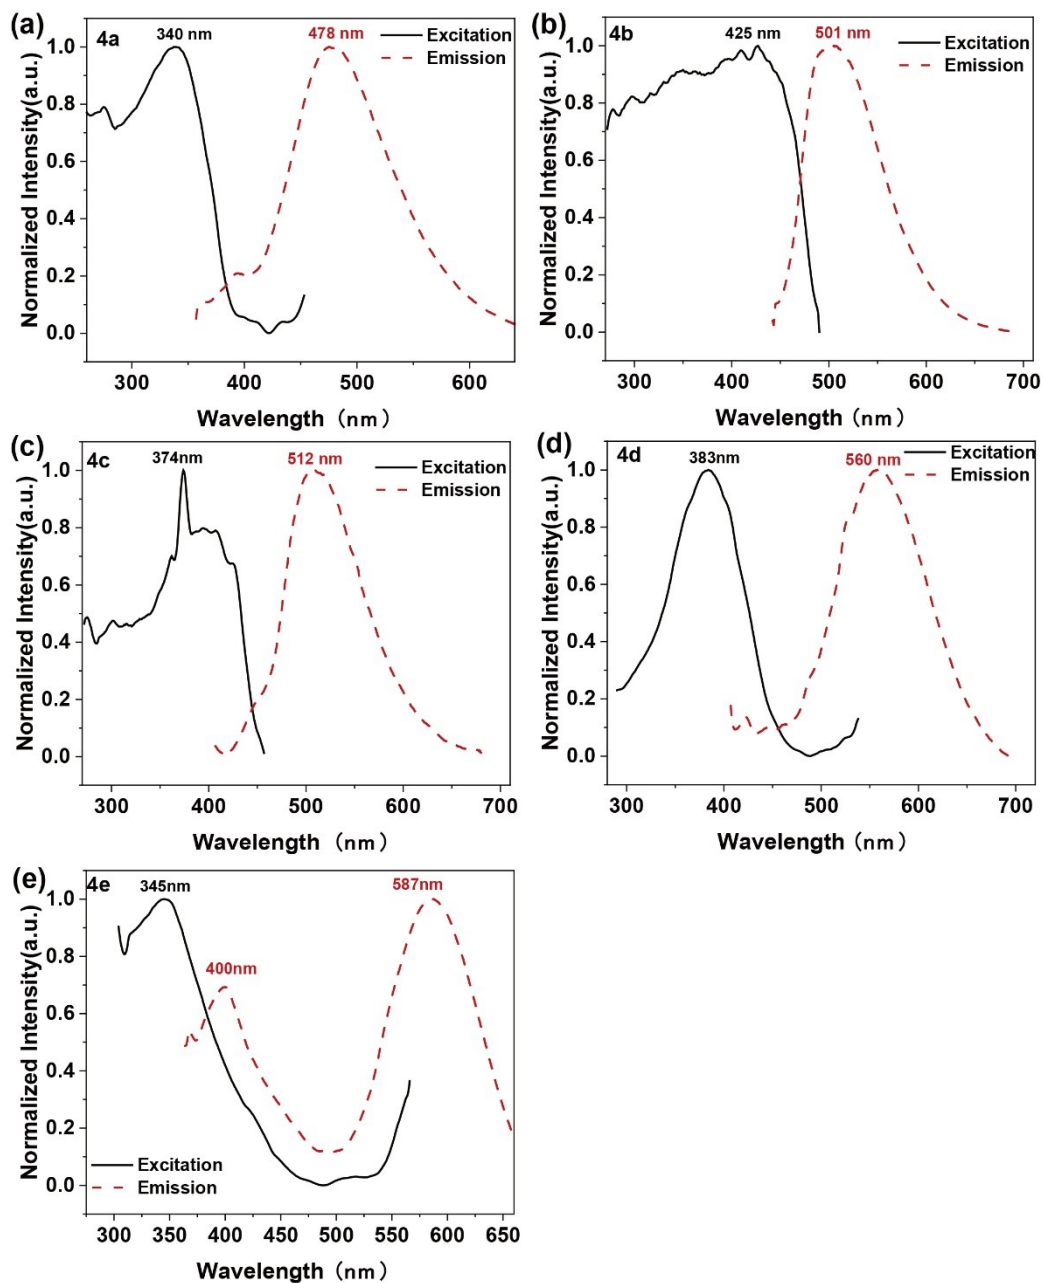

Figure S6. Fluorescence excitation (solid line) and emission spectra (dashed line) of **3a**.

## 5. The fluorescence lifetime decay spectra

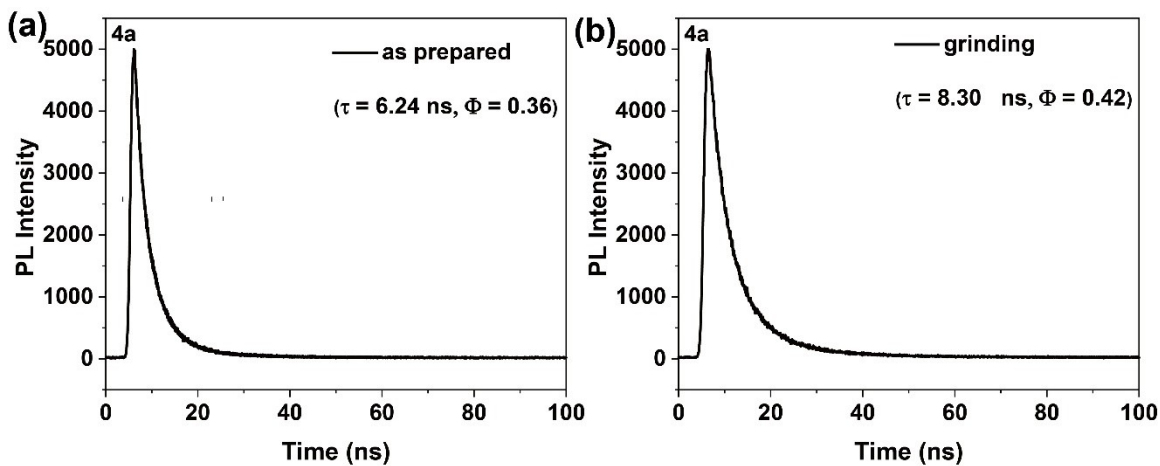

Figure S7. Fluorescence lifetime decay spectra of 4a.

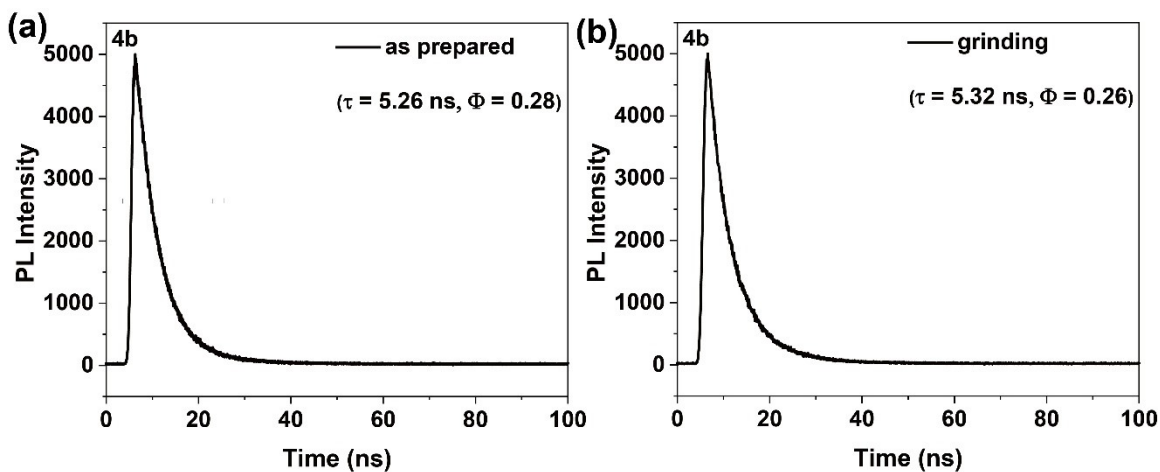

Figure S8. Fluorescence lifetime decay spectra of 4b.

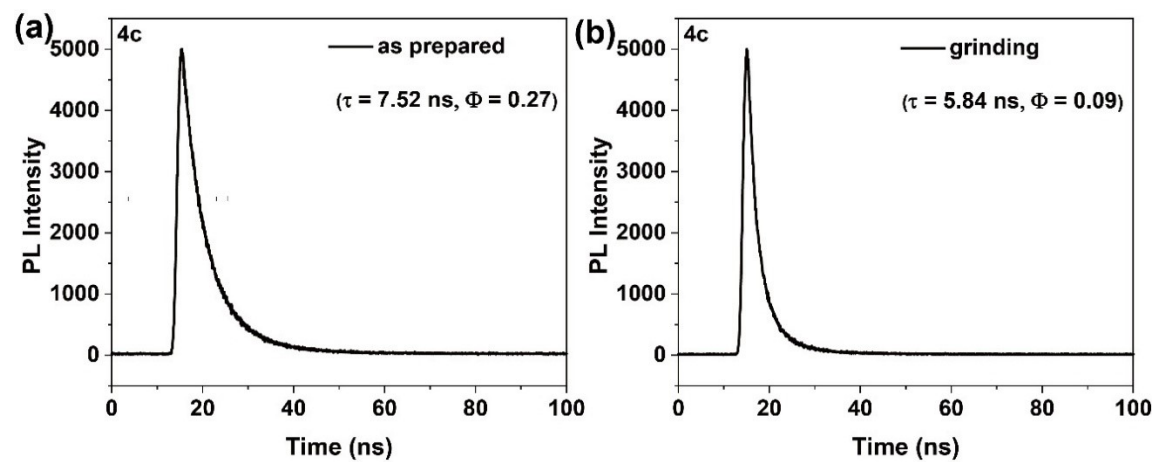

Figure S9. Fluorescence lifetime decay spectra of 4c.

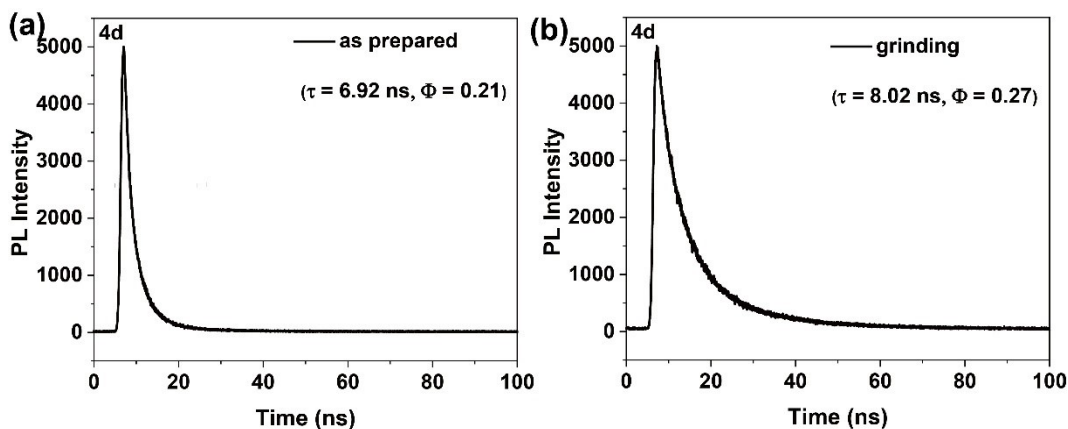

Figure S10. Fluorescence lifetime decay spectra of **4d**.

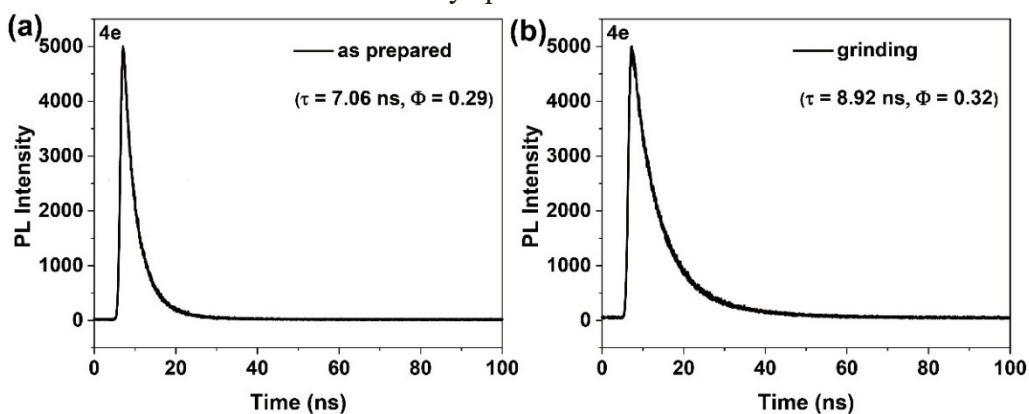

Figure S11. Fluorescence lifetime decay spectra of **4e**.

## 6. The Experimental and the Calculated UV-Vis spectra

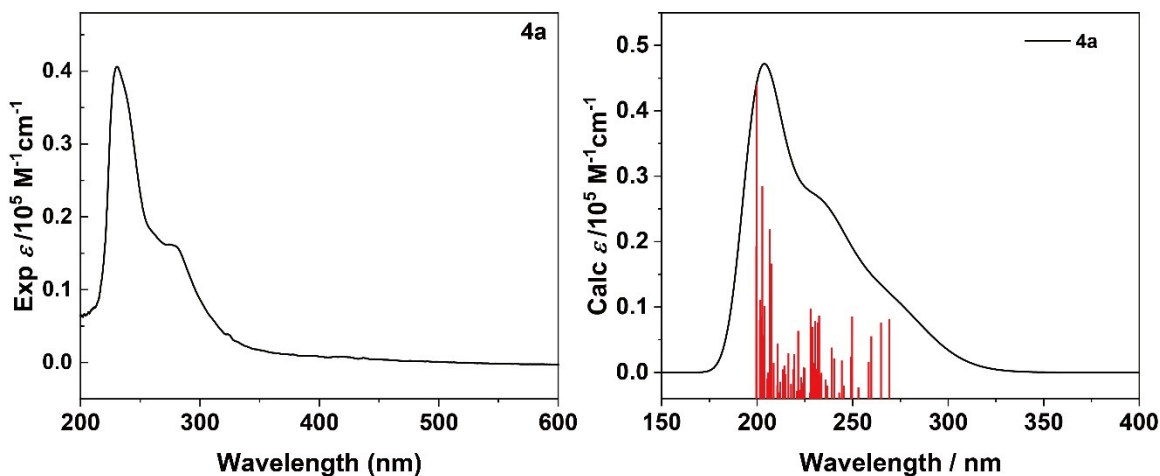

Figure S12. Computed, at the TD-DFT, B3LYP-D3/6-31g(d)<sup>[3-6]</sup>, scrf = (solvent = THF), level of theory and experimental UV-vis spectra of **4a**.

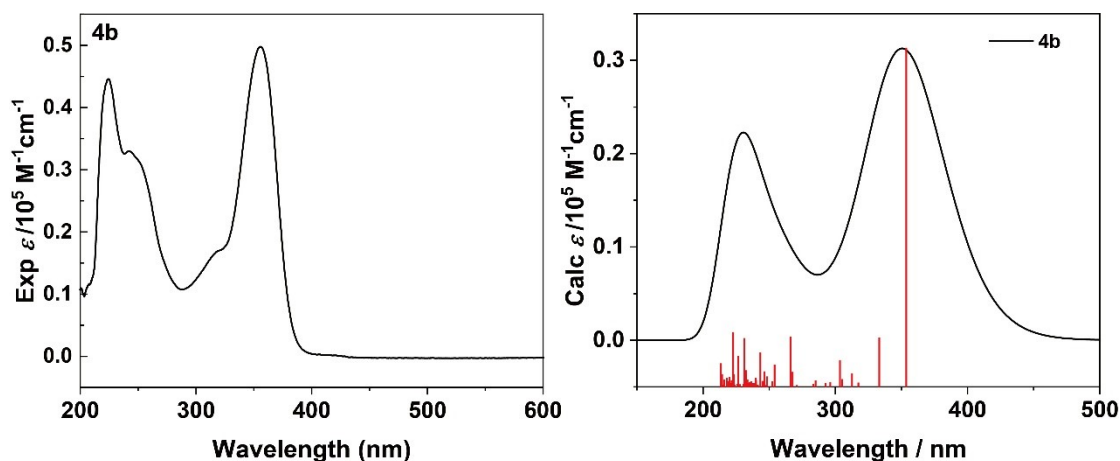

**Figure S13.** Computed, at the TD-DFT, B3LYP-D3/6-31g(d), scrf = (solvent = THF), level of theory and experimental UV-vis spectra of **4b**.

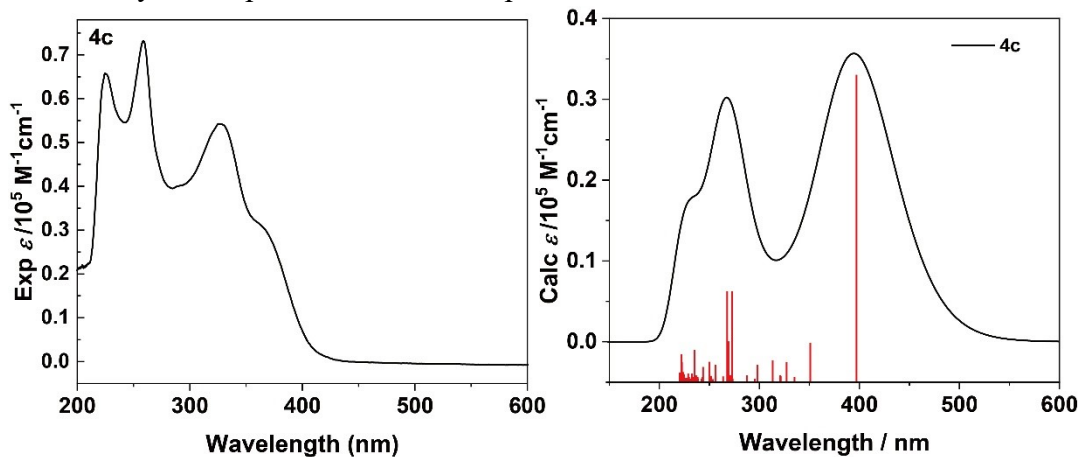

**Figure S14.** Computed, at the TD-DFT, B3LYP-D3/6-31g(d), scrf = (solvent = THF), level of theory and experimental UV-vis spectra of **4c**.

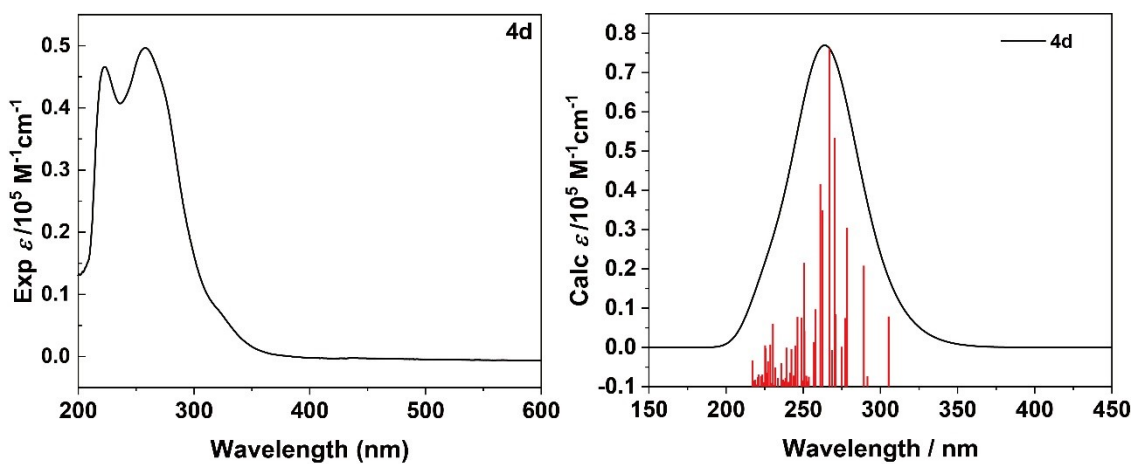

**Figure S15.** Computed, at the TD-DFT, B3LYP-D3/6-31g(d), scrf = (solvent = THF), level of theory and experimental UV-vis spectra of **4d**.

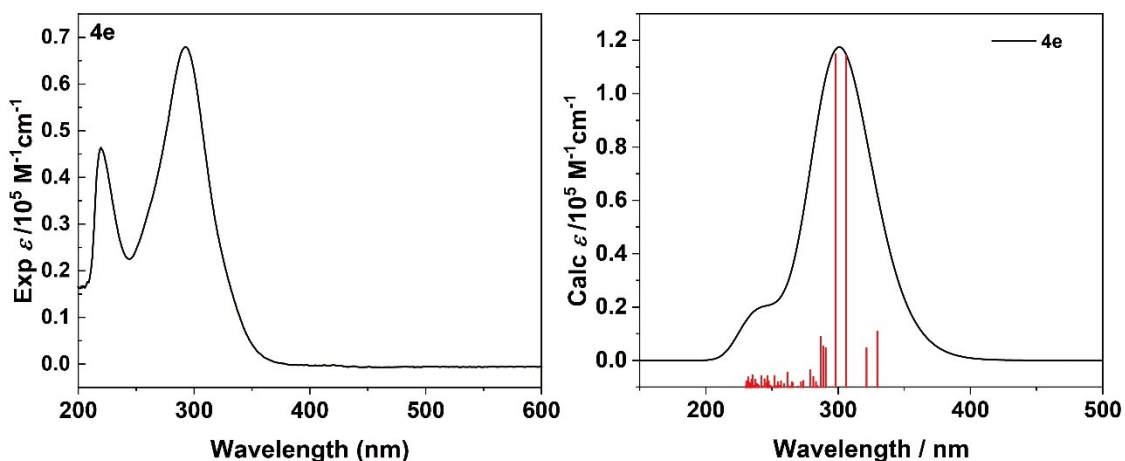

**Figure S16.** Computed, at the TD-DFT, B3LYP-D3/6-31g(d, p), scrf = (solvent = THF) level of theory and experimental UV-vis spectra of **4e**.

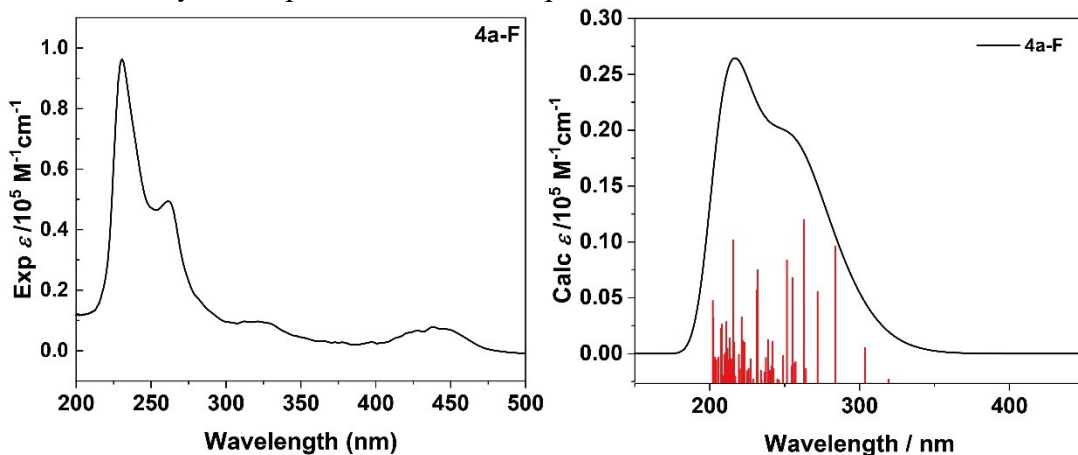

**Figure S17** Computed, at the TD-DFT, B3LYP-D3/6-31g(d, p), scrf = (solvent = THF) level of theory and experimental UV-vis spectra of **4a-F**.

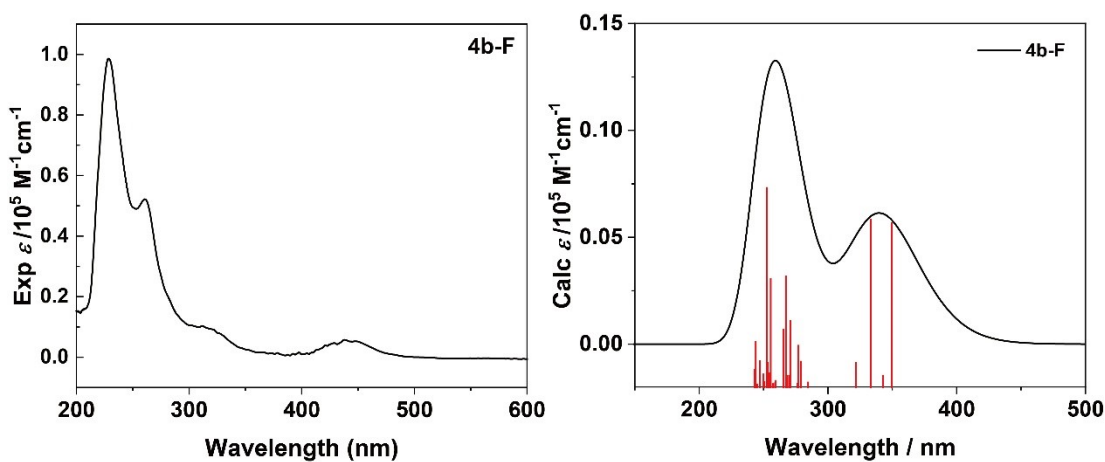

**Figure S18.** Computed, at the TD-DFT, B3LYP-D3/6-31g(d, p), scrf = (solvent = THF) level of theory and experimental UV-vis spectra of **4b-F**.

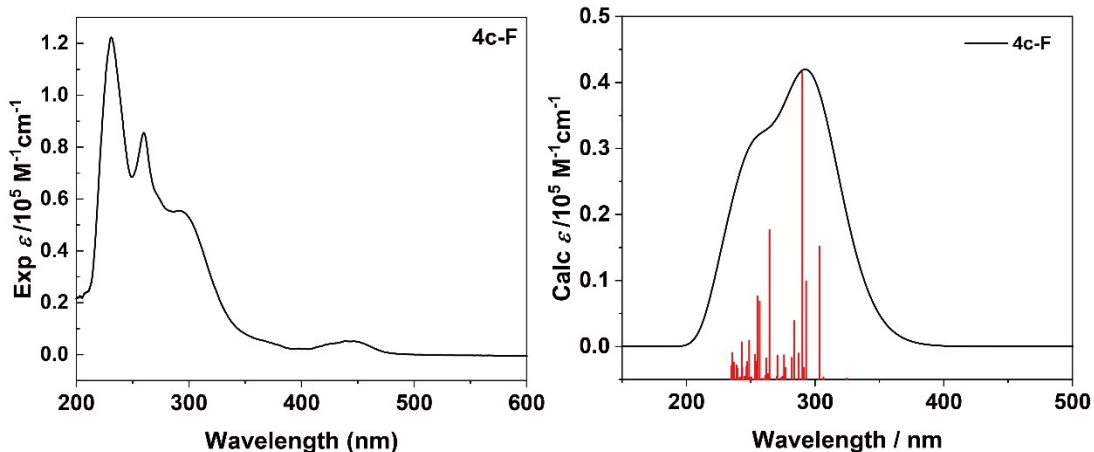

**Figure S19.** Computed, at the TD-DFT, B3LYP-D3/6-31g(d, p), scrf = (solvent = THF) level of theory and experimental UV-vis spectra of **4c-F**.

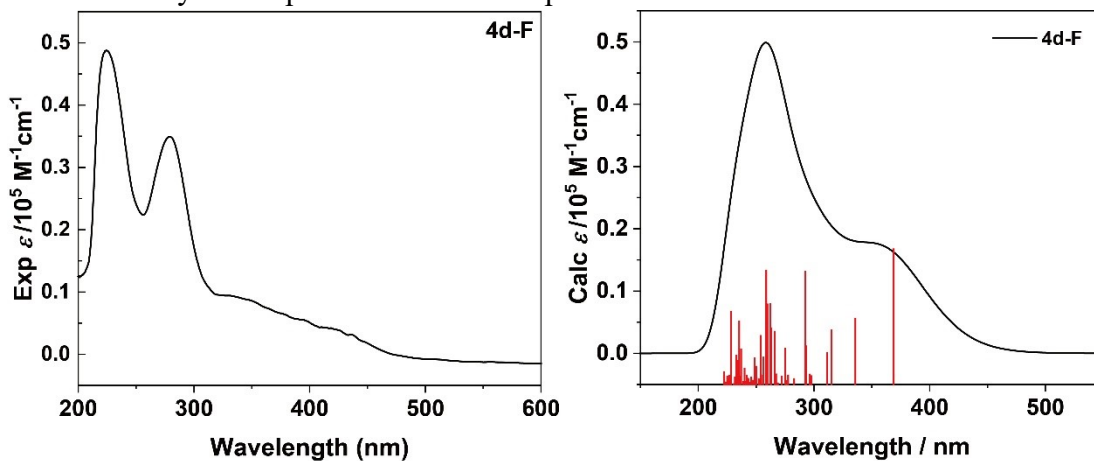

**Figure S20.** Computed, at the TD-DFT, B3LYP-D3/6-31g(d, p), scrf = (solvent = THF) level of theory and experimental UV-vis spectra of **4d-F**.

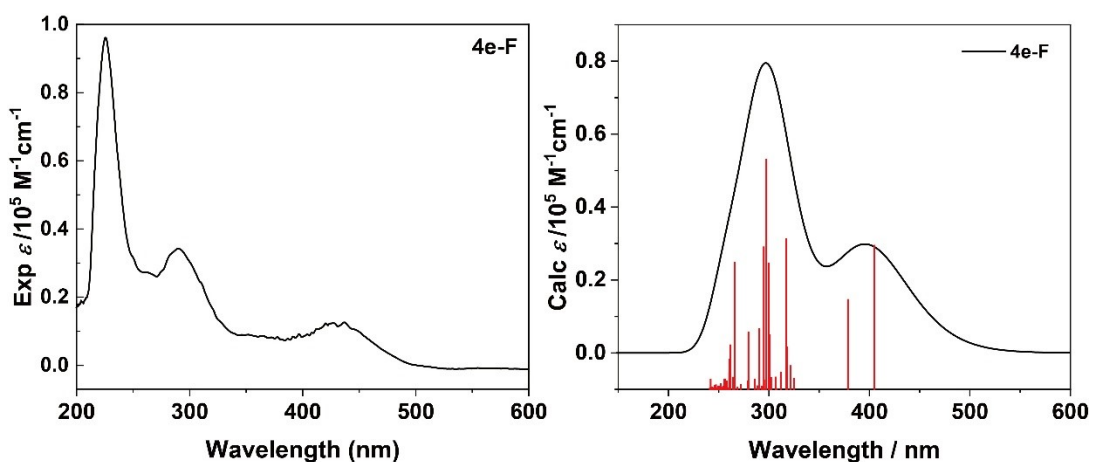

**Figure S21.** Computed, at the TD-DFT, B3LYP-D3/6-31g(d, p), scrf = (solvent = THF) level of theory and experimental UV-vis spectra of **4e-F**.

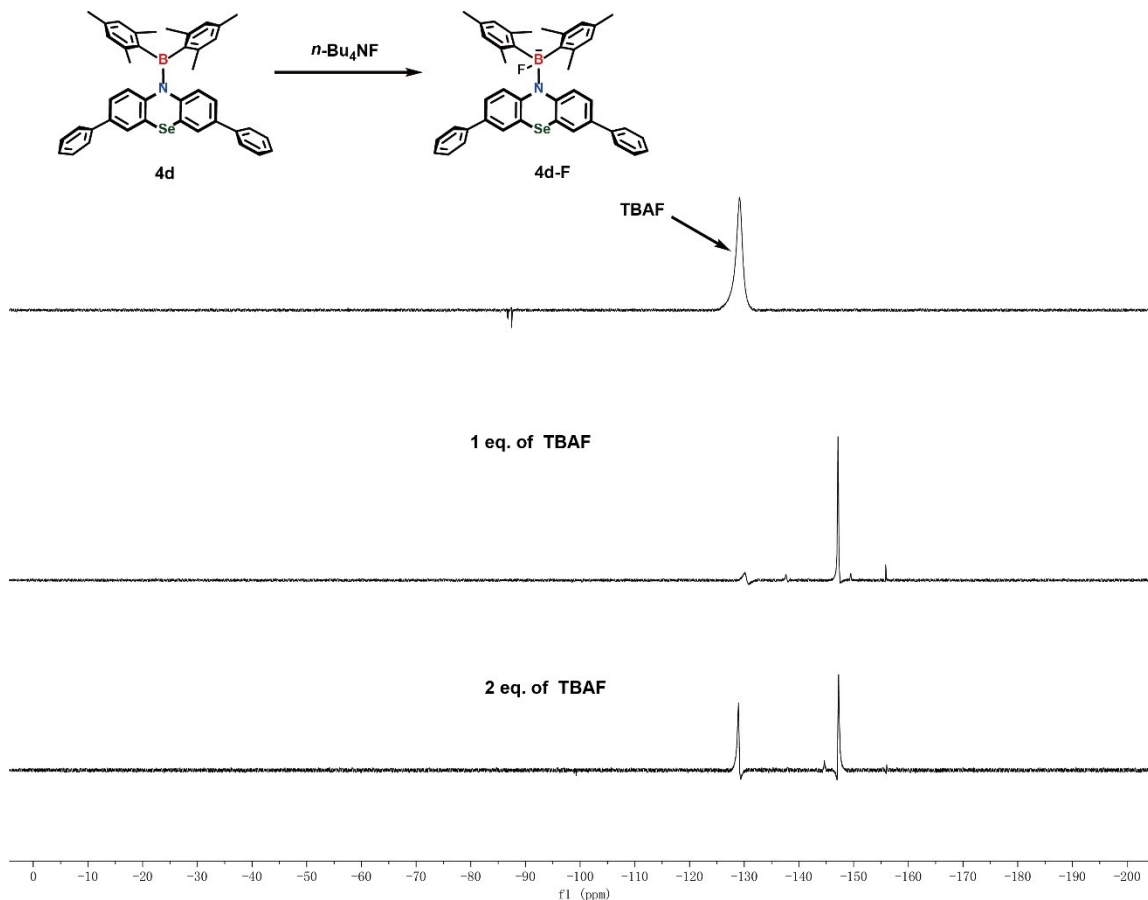

**Figure S22.** (top) Fluoride anion binding to model compound **4d**. (bottom)  $^{19}\text{F}$  NMR spectra of a mixture of **4d** after addition of TBAF.

**Table S6** Photophysical data for **4a-4e**.

| Comp.     | $\lambda_{\text{abs1}}^{\text{a}}$<br>(nm) | $\lambda_{\text{abs2}}^{\text{a}}$<br>(nm) | $\lambda_{\text{em}}^{\text{b}}$<br>(nm) | $\text{SS}_1^{\text{c}}$<br>( $\text{cm}^{-1}$ ) | $\text{SS}_2^{\text{c}}$<br>( $\text{cm}^{-1}$ ) | $\tau^{\text{d}}$<br>(ns) | $\text{QY}^{\text{e}}$<br>(%) |
|-----------|--------------------------------------------|--------------------------------------------|------------------------------------------|--------------------------------------------------|--------------------------------------------------|---------------------------|-------------------------------|
| <b>4a</b> | 230                                        | 278                                        | 478                                      | 22558                                            | 15051                                            | 6.24                      | 36                            |
| <b>4b</b> | 225                                        | 356                                        | 488                                      | 23953                                            | 7598                                             | 5.26                      | 28                            |
| <b>4c</b> | 226                                        | 327                                        | 522                                      | 25091                                            | 11424                                            | 7.52                      | 27                            |
| <b>4d</b> | 223                                        | 259                                        | 564                                      | 27113                                            | 20880                                            | 6.92                      | 21                            |
| <b>4e</b> | 222                                        | 294                                        | 587                                      | 28009                                            | 16978                                            | 7.06                      | 29                            |

<sup>a</sup> The  $\lambda_{\text{max}}$  values in the UV-vis spectra. <sup>b</sup> Emission maxima in THF. <sup>c</sup> Stokes shift =  $1/\lambda_{\text{abs}} - 1/\lambda_{\text{em}}$ . <sup>d</sup> Lifetimes in the solid state. <sup>e</sup> Quantum yield in the solid state.

**Table S7** Calculated ( $\lambda_{\text{TD-DFT}}$ ) wavelengths of **4a**. Molecular orbitals (MOs) involved in the main electronic transition,  $f$  corresponds to the oscillator strength. (TD-DFT, B3LYP/6-31g(d, p))

| $\lambda_{\text{TD-DFT}}$ | Oscillator Strength, $f$ | MOs             |        |
|---------------------------|--------------------------|-----------------|--------|
| 281.56                    | 0.0555                   | HOMO ->LUMO     | 64.93% |
|                           |                          | HOMO ->LUMO+1   | 10.14% |
|                           |                          | HOMO ->LUMO+2   | 19.75% |
| 276.42                    | 0.0526                   | HOMO ->LUMO     | 12.41% |
|                           |                          | HOMO ->LUMO+1   | 38.87% |
|                           |                          | HOMO ->LUMO+2   | 52.33% |
|                           |                          | HOMO ->LUMO+8   | 15.21% |
| 258.33                    | 0.0572                   | HOMO-4 ->LUMO   | 20.15% |
|                           |                          | HOMO-3 ->LUMO   | 45.16% |
|                           |                          | HOMO-2 ->LUMO   | 14.11% |
|                           |                          | HOMO-1 ->LUMO+1 | 11.62% |
|                           |                          | HOMO ->LUMO+3   | 29.77% |
|                           |                          | HOMO ->LUMO+4   | 26.78% |
| 245.50                    | 0.0351                   | HOMO-4 ->LUMO+2 | 10.59% |
|                           |                          | HOMO-3 ->LUMO   | 12.10% |
|                           |                          | HOMO-3 ->LUMO+1 | 10.44% |
|                           |                          | HOMO-2 ->LUMO+1 | 19.77% |
|                           |                          | HOMO-2 ->LUMO+3 | 14.59% |
|                           |                          | HOMO-1 ->LUMO+1 | 14.92% |
|                           |                          | HOMO-1 ->LUMO+2 | 49.09% |
|                           |                          | HOMO-1 ->LUMO+3 | 16.04% |
| 237.54                    | 0.0577                   | HOMO-1 ->LUMO+6 | 13.41% |
|                           |                          | HOMO-4 ->LUMO+1 | 27.11% |
|                           |                          | HOMO-4 ->LUMO+2 | 18.19% |
|                           |                          | HOMO-2 ->LUMO+2 | 45.97% |
|                           |                          | HOMO-1 ->LUMO+3 | 31.01% |
| 232.13                    | 0.0626                   | HOMO-1 ->LUMO+4 | 12.78% |
|                           |                          | HOMO-5 ->LUMO   | 48.50% |
|                           |                          | HOMO-4 ->LUMO+2 | 23.61% |
|                           |                          | HOMO-3 ->LUMO+5 | 12.01% |
|                           |                          | HOMO-2 ->LUMO+2 | 15.36% |
|                           |                          | HOMO-1 ->LUMO+3 | 10.64% |
|                           |                          | HOMO ->LUMO+5   | 21.47% |
| HOMO ->LUMO+8             | 15.40%                   |                 |        |

**Table S8.** Calculated ( $\lambda_{\text{TD-DFT}}$ ) wavelengths of **4b**. Molecular orbitals (MOs) involved in the main electronic transition, f corresponds to the oscillator strength. (TD-DFT, B3LYP/6-31g(d, p))

| $\lambda_{\text{TD-DFT}}$ | Oscillator Strength, f | MOs             |        |
|---------------------------|------------------------|-----------------|--------|
| 354.14                    | 0.6782                 | HOMO-4 ->LUMO   | 10.62% |
|                           |                        | HOMO-3 ->LUMO   | 11.01% |
|                           |                        | HOMO ->LUMO     | 67.69% |
| 333.77                    | 0.0952                 | HOMO-2 ->LUMO   | 69.91% |
|                           |                        | HOMO-1 ->LUMO   | 47.68% |
| 266.55                    | 0.0980                 | HOMO-4 ->LUMO+2 | 10.10% |
|                           |                        | HOMO-1 ->LUMO+2 | 59.25% |
|                           |                        | HOMO-1 ->LUMO+4 | 16.31% |
|                           |                        | HOMO-1 ->LUMO+9 | 17.94% |
|                           |                        | HOMO ->LUMO+2   | 10.89% |
|                           |                        | HOMO ->LUMO+4   | 12.62% |
|                           |                        | HOMO ->LUMO+9   | 14.42% |
| 232.92                    | 0.0301                 | HOMO-10 ->LUMO  | 12.79% |
|                           |                        | HOMO-5 ->LUMO+1 | 36.24% |
|                           |                        | HOMO-5 ->LUMO+5 | 13.86% |
|                           |                        | HOMO-4 ->LUMO+2 | 14.13% |
|                           |                        | HOMO-4 ->LUMO+3 | 21.08% |
|                           |                        | HOMO-4 ->LUMO+4 | 10.30% |
|                           |                        | HOMO-3 ->LUMO+2 | 10.08% |
|                           |                        | HOMO-3 ->LUMO+3 | 13.40% |
|                           |                        | HOMO-2 ->LUMO+7 | 13.80% |
|                           |                        | HOMO ->LUMO+8   | 33.83% |
| 232.51                    | 0.0246                 | HOMO-7 ->LUMO+3 | 10.27% |
|                           |                        | HOMO-1 ->LUMO+6 | 26.49% |
|                           |                        | HOMO-1 ->LUMO+7 | 19.35% |
|                           |                        | HOMO-1 ->LUMO+9 | 40.74% |
|                           |                        | HOMO ->LUMO+8   | 16.35% |
|                           |                        | HOMO ->LUMO+9   | 28.00% |
| 214.05                    | 0.0441                 | HOMO-8 ->LUMO+1 | 13.35% |
|                           |                        | HOMO-8 ->LUMO+3 | 13.77% |
|                           |                        | HOMO-7 ->LUMO+1 | 42.24% |
|                           |                        | HOMO-7 ->LUMO+3 | 38.94% |
|                           |                        | HOMO-6 ->LUMO+3 | 23.50% |
|                           |                        | HOMO-1 ->LUMO+8 | 26.27% |

**Table S9.** Calculated ( $\lambda_{\text{TD-DFT}}$ ) wavelengths of **4c**. Molecular orbitals (MOs) involved in the main electronic transition,  $f$  corresponds to the oscillator strength. (TD-DFT, B3LYP/6-31g(d, p))

| $\lambda_{\text{TD-DFT}}$ | Oscillator Strength, $f$ | MOs              |        |
|---------------------------|--------------------------|------------------|--------|
| 397.41                    | 0.8377                   | HOMO ->LUMO      | 69.44% |
| 298.57                    | 0.0405                   | HOMO-1 ->LUMO+1  | 10.89% |
|                           |                          | HOMO ->LUMO+2    | 28.96% |
|                           |                          | HOMO ->LUMO+3    | 60.71% |
|                           |                          | HOMO ->LUMO+5    | 11.77% |
| 272.85                    | 0.2428                   | HOMO-6 ->LUMO    | 57.58% |
|                           |                          | HOMO-1 ->LUMO+1  | 32.19% |
|                           |                          | HOMO ->LUMO+5    | 13.50% |
| 269.51                    | 0.1049                   | HOMO-1 ->LUMO+2  | 52.49% |
|                           |                          | HOMO-1 ->LUMO+3  | 25.92% |
|                           |                          | HOMO-1 ->LUMO+4  | 20.37% |
|                           |                          | HOMO-1 ->LUMO+11 | 19.80% |
|                           |                          | HOMO ->LUMO+11   | 14.47% |
| 268.14                    | 0.2431                   | HOMO-1 ->LUMO+1  | 25.76% |
|                           |                          | HOMO ->LUMO+5    | 62.54% |
| 235.30                    | 0.0812                   | HOMO-13 ->LUMO   | 31.70% |
|                           |                          | HOMO-12 ->LUMO   | 15.30% |
|                           |                          | HOMO-11 ->LUMO   | 29.74% |
|                           |                          | HOMO-4 ->LUMO+1  | 18.59% |
|                           |                          | HOMO-1 ->LUMO+5  | 13.75% |
|                           |                          | HOMO ->LUMO+10   | 41.62% |
| 222.81                    | 0.0479                   | HOMO-6 ->LUMO+1  | 21.11% |
|                           |                          | HOMO-5 ->LUMO+3  | 14.80% |
|                           |                          | HOMO-5 ->LUMO+7  | 11.28% |
|                           |                          | HOMO-4 ->LUMO+5  | 14.86% |
|                           |                          | HOMO-4 ->LUMO+6  | 10.90% |
|                           |                          | HOMO-4 ->LUMO+7  | 16.92% |
|                           |                          | HOMO-3 ->LUMO+6  | 11.14% |
|                           |                          | HOMO-3 ->LUMO+7  | 22.97% |
|                           |                          | HOMO-2 ->LUMO+7  | 17.46% |
|                           |                          | HOMO-1 ->LUMO+6  | 10.06% |
|                           |                          | HOMO-1 ->LUMO+7  | 10.11% |
|                           |                          | HOMO-1 ->LUMO+8  | 16.57% |
| HOMO ->LUMO+12            | 30.28%                   |                  |        |

**Table S10.** Calculated ( $\lambda_{\text{TD-DFT}}$ ) wavelengths of **4d**. Molecular orbitals (Mos) involved in the main electronic transition,  $f$  corresponds to the oscillator strength. (TD-DFT, B3LYP/6-31g(d, p))

| $\lambda_{\text{TD-DFT}}$ | Oscillator Strength, $f$ | MOs             |        |
|---------------------------|--------------------------|-----------------|--------|
| 305.18                    | 0.0780                   | HOMO ->LUMO     | 67.86% |
| 291.52                    | 0.0098                   | HOMO ->LUMO+1   | 67.77% |
| 289.19                    | 0.1358                   | HOMO-1 ->LUMO   | 66.54% |
|                           |                          | HOMO ->LUMO+2   | 11.08% |
| 278.33                    | 0.1790                   | HOMO-4 ->LUMO   | 12.25% |
|                           |                          | HOMO-3 ->LUMO   | 38.84% |
|                           |                          | HOMO-1 ->LUMO   | 16.93% |
|                           |                          | HOMO-1 ->LUMO+1 | 21.11% |
|                           |                          | HOMO ->LUMO+2   | 37.84% |
|                           |                          | HOMO ->LUMO+3   | 25.03% |
|                           |                          | HOMO ->LUMO+4   | 10.11% |
| 270.16                    | 0.2814                   | HOMO-4 ->LUMO   | 31.60% |
|                           |                          | HOMO-3 ->LUMO   | 39.43% |
|                           |                          | HOMO-2 ->LUMO+1 | 11.20% |
|                           |                          | HOMO-1 ->LUMO+1 | 31.17% |
|                           |                          | HOMO ->LUMO+2   | 26.45% |
|                           |                          | HOMO ->LUMO+3   | 14.89% |
| 266.97                    | 0.3826                   | HOMO-5 ->LUMO   | 67.38% |
| 262.37                    | 0.1986                   | HOMO-6 ->LUMO   | 12.48% |
|                           |                          | HOMO-6 ->LUMO+1 | 11.96% |
|                           |                          | HOMO-4 ->LUMO+1 | 14.33% |
|                           |                          | HOMO-3 ->LUMO+1 | 50.99% |
|                           |                          | HOMO-3 ->LUMO+3 | 10.56% |
|                           |                          | HOMO-2 ->LUMO+1 | 21.60% |
|                           |                          | HOMO-1 ->LUMO+1 | 18.17% |
|                           |                          | HOMO-1 ->LUMO+2 | 13.69% |
|                           |                          | HOMO-1 ->LUMO+4 | 10.54% |
| 260.97                    | 0.2286                   | HOMO-6 ->LUMO   | 58.34% |
|                           |                          | HOMO-3 ->LUMO   | 10.06% |
|                           |                          | HOMO-3 ->LUMO+1 | 13.21% |
|                           |                          | HOMO-1 ->LUMO+1 | 10.25% |
|                           |                          | HOMO-1 ->LUMO+2 | 15.86% |
|                           |                          | HOMO ->LUMO+2   | 14.48% |

**Table S11.** Calculated ( $\lambda_{\text{TD-DFT}}$ ) wavelengths of **4e**. Molecular orbitals (MOs) involved in the main electronic transition,  $f$  corresponds to the oscillator strength. (TD-DFT, B3LYP/6-31g(d, p))

| $\lambda_{\text{TD-DFT}}$ | Oscillator Strength, $f$ | MOs             |        |
|---------------------------|--------------------------|-----------------|--------|
| 329.76                    | 0.1919                   | HOMO ->LUMO     | 67.99% |
|                           |                          | HOMO ->LUMO+3   | 10.04% |
| 290.80                    | 0.1351                   | HOMO-3 ->LUMO   | 14.44% |
|                           |                          | HOMO-2 ->LUMO   | 29.27% |
|                           |                          | HOMO-2 ->LUMO+1 | 48.91% |
|                           |                          | HOMO-1 ->LUMO   | 32.18% |
| 288.84                    | 0.1400                   | HOMO-3 ->LUMO   | 19.62% |
|                           |                          | HOMO-2 ->LUMO   | 19.77% |
|                           |                          | HOMO-1 ->LUMO+1 | 60.31% |
|                           |                          | HOMO ->LUMO+2   | 14.95% |
| 287.34                    | 0.1741                   | HOMO-4 ->LUMO   | 17.86% |
|                           |                          | HOMO-3 ->LUMO   | 45.51% |
|                           |                          | HOMO-2 ->LUMO   | 21.49% |
|                           |                          | HOMO-2 ->LUMO+1 | 20.29% |
|                           |                          | HOMO-1 ->LUMO+1 | 10.81% |
|                           |                          | HOMO ->LUMO+2   | 21.57% |
|                           |                          | HOMO ->LUMO+4   | 24.08% |
| 235.62                    | 0.0403                   | HOMO-13 ->LUMO  | 15.75% |
|                           |                          | HOMO-9 ->LUMO   | 17.02% |
|                           |                          | HOMO-9 ->LUMO+1 | 16.28% |
|                           |                          | HOMO-8 ->LUMO   | 10.99% |
|                           |                          | HOMO-2 ->LUMO+5 | 13.15% |
|                           |                          | HOMO-2 ->LUMO+7 | 11.61% |
|                           |                          | HOMO-1 ->LUMO+5 | 21.50% |
|                           |                          | HOMO-1 ->LUMO+6 | 11.66% |
|                           |                          | HOMO-1 ->LUMO+7 | 25.21% |
|                           |                          | HOMO ->LUMO+12  | 30.76% |

**Table S12.** Calculated ( $\lambda_{\text{TD-DFT}}$ ) wavelengths of **4a-F**. Molecular orbitals (MOs) involved in the main electronic transition,  $f$  corresponds to the oscillator strength. (TD-DFT, B3LYP/6-31g(d, p))

| $\lambda_{\text{TD-DFT}}$ | Oscillator Strength, $f$ | MOs             |        |
|---------------------------|--------------------------|-----------------|--------|
| 304.08                    | 0.0235                   | HOMO ->LUMO     | 39.52% |
|                           |                          | HOMO ->LUMO+1   | 56.70% |
| 284.41                    | 0.0933                   | HOMO ->LUMO+2   | 60.82% |
|                           |                          | HOMO ->LUMO+3   | 27.34% |
|                           |                          | HOMO ->LUMO+4   | 13.27% |
| 263.16                    | 0.1116                   | HOMO-4 ->LUMO   | 12.98% |
|                           |                          | HOMO-4 ->LUMO+1 | 10.19% |
|                           |                          | HOMO-2 ->LUMO   | 29.07% |
|                           |                          | HOMO-2 ->LUMO+1 | 22.49% |
|                           |                          | HOMO ->LUMO+3   | 20.79% |
|                           |                          | HOMO ->LUMO+4   | 15.98% |
|                           |                          | HOMO ->LUMO+6   | 35.48% |
|                           |                          | HOMO ->LUMO+7   | 16.99% |
| 255.77                    | 0.0717                   | HOMO ->LUMO+8   | 22.04% |
|                           |                          | HOMO-4 ->LUMO+1 | 13.21% |
|                           |                          | HOMO-2 ->LUMO   | 19.26% |
|                           |                          | HOMO-2 ->LUMO+1 | 14.50% |
|                           |                          | HOMO-1 ->LUMO   | 30.55% |
|                           |                          | HOMO-1 ->LUMO+1 | 34.21% |
|                           |                          | HOMO ->LUMO+5   | 28.75% |
|                           |                          | HOMO ->LUMO+6   | 25.89% |
| 252.00                    | 0.0835                   | HOMO ->LUMO+8   | 10.45% |
|                           |                          | HOMO-4 ->LUMO+1 | 12.39% |
|                           |                          | HOMO-3 ->LUMO+1 | 11.22% |
|                           |                          | HOMO-2 ->LUMO   | 26.92% |
|                           |                          | HOMO-2 ->LUMO+1 | 48.56% |
|                           |                          | HOMO-1 ->LUMO   | 15.76% |
|                           |                          | HOMO-1 ->LUMO+1 | 17.19% |
| HOMO-1 ->LUMO+2           | 16.39%                   |                 |        |

**Table S13.** Calculated ( $\lambda_{\text{TD-DFT}}$ ) wavelengths of **4b-F**. Molecular orbitals (MOs) involved in the main electronic transition,  $f$  corresponds to the oscillator strength. (TD-DFT, B3LYP/6-31g(d, p))

| $\lambda_{\text{TD-DFT}}$ | Oscillator Strength, $f$ | MOs             |        |
|---------------------------|--------------------------|-----------------|--------|
| 334.05                    | 0.0768                   | HOMO ->LUMO+2   | 69.72% |
| 271.84                    | 0.0273                   | HOMO-5 ->LUMO+1 | 50.54% |
|                           |                          | HOMO-5 ->LUMO+4 | 10.23% |
|                           |                          | HOMO-2 ->LUMO+1 | 21.47% |
|                           |                          | HOMO-1 ->LUMO+3 | 13.47% |
|                           |                          | HOMO ->LUMO+4   | 27.82% |
|                           |                          | HOMO ->LUMO+5   | 20.30% |
| 271.41                    | 0.0206                   | HOMO-5 ->LUMO   | 62.19% |
|                           |                          | HOMO-2 ->LUMO+1 | 23.50% |
| 256.41                    | 0.0448                   | HOMO-5 ->LUMO+2 | 65.17% |
|                           |                          | HOMO-3 ->LUMO+1 | 12.58% |
|                           |                          | HOMO-3 ->LUMO+2 | 10.62% |
| 253.21                    | 0.0361                   | HOMO-4 ->LUMO+1 | 41.19% |
|                           |                          | HOMO-4 ->LUMO+2 | 20.22% |
|                           |                          | HOMO-3 ->LUMO+2 | 35.17% |
|                           |                          | HOMO ->LUMO+6   | 37.90% |
| 247.91                    | 0.0109                   | HOMO-7 ->LUMO   | 27.72% |
|                           |                          | HOMO-6 ->LUMO   | 48.48% |
|                           |                          | HOMO-1 ->LUMO+7 | 10.85% |
|                           |                          | HOMO ->LUMO+5   | 10.11% |
|                           |                          | HOMO ->LUMO+7   | 21.48% |
|                           |                          | HOMO ->LUMO+8   | 20.05% |
|                           |                          | HOMO ->LUMO+9   | 10.53% |
| 244.81                    | 0.0188                   | HOMO-6 ->LUMO   | 20.36% |
|                           |                          | HOMO-4 ->LUMO+3 | 12.20% |
|                           |                          | HOMO-4 ->LUMO+6 | 14.51% |
|                           |                          | HOMO-3 ->LUMO+3 | 26.99% |
|                           |                          | HOMO-1 ->LUMO+6 | 10.38% |
|                           |                          | HOMO-1 ->LUMO+7 | 14.69% |
|                           |                          | HOMO ->LUMO+8   | 38.93% |
|                           |                          | HOMO ->LUMO+9   | 20.22% |

**Table S14.** Calculated ( $\lambda_{\text{TD-DFT}}$ ) wavelengths of **4c-F**. Molecular orbitals (MOs) involved in the main electronic transition,  $f$  corresponds to the oscillator strength. (TD-DFT, B3LYP/6-31g(d, p))

| $\lambda_{\text{TD-DFT}}$ | Oscillator Strength, $f$ | MOs              |        |
|---------------------------|--------------------------|------------------|--------|
| 312.49                    | 0.2010                   | HOMO-1 ->LUMO    | 16.77% |
|                           |                          | HOMO ->LUMO      | 64.78% |
|                           |                          | HOMO ->LUMO+1    | 17.34% |
| 298.90                    | 0.1485                   | HOMO-3 ->LUMO    | 25.47% |
|                           |                          | HOMO-2 ->LUMO    | 62.89% |
|                           |                          | HOMO-2 ->LUMO+1  | 16.60% |
| 295.25                    | 0.4646                   | HOMO-3 ->LUMO    | 61.69% |
|                           |                          | HOMO-2 ->LUMO    | 23.77% |
|                           |                          | HOMO-1 ->LUMO+2  | 15.23% |
| 250.18                    | 0.1261                   | HOMO-6 ->LUMO    | 12.21% |
|                           |                          | HOMO-6 ->LUMO+1  | 60.13% |
|                           |                          | HOMO-1 ->LUMO+4  | 10.33% |
|                           |                          | HOMO-1 ->LUMO+7  | 26.61% |
| 234.62                    | 0.0561                   | HOMO-8 ->LUMO+1  | 15.96% |
|                           |                          | HOMO-5 ->LUMO+4  | 12.25% |
|                           |                          | HOMO-2 ->LUMO+6  | 17.50% |
|                           |                          | HOMO-2 ->LUMO+8  | 18.73% |
|                           |                          | HOMO-2 ->LUMO+9  | 10.96% |
|                           |                          | HOMO ->LUMO+7    | 11.51% |
|                           |                          | HOMO ->LUMO+8    | 43.71% |
| HOMO ->LUMO+9             | 23.42%                   |                  |        |
| 224.62                    | 0.202                    | HOMO-9 ->LUMO+1  | 15.59% |
|                           |                          | HOMO-8 ->LUMO+1  | 13.14% |
|                           |                          | HOMO-7 ->LUMO+1  | 15.53% |
|                           |                          | HOMO-7 ->LUMO+3  | 22.92% |
|                           |                          | HOMO-3 ->LUMO+6  | 12.43% |
|                           |                          | HOMO-3 ->LUMO+8  | 41.29% |
|                           |                          | HOMO-2 ->LUMO+7  | 10.89% |
|                           |                          | HOMO-2 ->LUMO+8  | 18.20% |
|                           |                          | HOMO-2 ->LUMO+9  | 12.97% |
|                           |                          | HOMO-2 ->LUMO+10 | 12.21% |
|                           |                          | HOMO ->LUMO+10   | 16.49% |

**Table S15.** Calculated ( $\lambda_{\text{TD-DFT}}$ ) wavelengths of **4d-F**. Molecular orbitals (MOs) involved in the main electronic transition,  $f$  corresponds to the oscillator strength. (TD-DFT, B3LYP/6-31g(d, p))

| $\lambda_{\text{TD-DFT}}$ | Oscillator Strength, $f$ | MOs             |        |
|---------------------------|--------------------------|-----------------|--------|
| 369.54                    | 0.3147                   | HOMO ->LUMO     | 69.05% |
|                           |                          | HOMO ->LUMO+5   | 10.12% |
| 336.35                    | 0.1233                   | HOMO ->LUMO+1   | 68.14% |
| 298.41                    | 0.157                    | HOMO ->LUMO+3   | 59.99% |
|                           |                          | HOMO ->LUMO+5   | 33.23% |
| 292.93                    | 0.2112                   | HOMO-4 ->LUMO   | 17.95% |
|                           |                          | HOMO-2 ->LUMO   | 57.85% |
|                           |                          | HOMO-1 ->LUMO   | 20.69% |
|                           |                          | HOMO-1 ->LUMO+1 | 14.40% |
|                           |                          | HOMO ->LUMO+8   | 10.08% |
| 263.84                    | 0.1054                   | HOMO-6 ->LUMO   | 11.82% |
|                           |                          | HOMO-5 ->LUMO   | 55.48% |
|                           |                          | HOMO-5 ->LUMO+1 | 13.92% |
|                           |                          | HOMO-4 ->LUMO+1 | 22.11% |
|                           |                          | HOMO-3 ->LUMO+1 | 25.88% |
|                           |                          | HOMO ->LUMO+7   | 10.12% |
| 263.04                    | 0.1508                   | HOMO-6 ->LUMO   | 60.37% |
|                           |                          | HOMO-6 ->LUMO+1 | 12.65% |
|                           |                          | HOMO-3 ->LUMO+1 | 27.02% |
| 260.32                    | 0.1498                   | HOMO-6 ->LUMO+1 | 20.96% |
|                           |                          | HOMO-5 ->LUMO+1 | 26.58% |
|                           |                          | HOMO-1 ->LUMO+2 | 47.92% |
|                           |                          | HOMO-1 ->LUMO+4 | 29.93% |
|                           |                          | HOMO ->LUMO+7   | 11.07% |
| 259.39                    | 0.2128                   | HOMO-6 ->LUMO+1 | 33.01% |
|                           |                          | HOMO-5 ->LUMO   | 10.69% |
|                           |                          | HOMO-5 ->LUMO+1 | 46.13% |
|                           |                          | HOMO-1 ->LUMO+2 | 26.87% |
|                           |                          | HOMO-1 ->LUMO+4 | 17.29% |
|                           |                          | HOMO ->LUMO+7   | 15.58% |

**Table S16.** Calculated ( $\lambda_{\text{TD-DFT}}$ ) wavelengths of **4e-F**. Molecular orbitals (MOs) involved in the main electronic transition,  $f$  corresponds to the oscillator strength. (TD-DFT, B3LYP/6-31g(d, p))

| $\lambda_{\text{TD-DFT}}$ | Oscillator Strength, $f$ | MOs            |        |
|---------------------------|--------------------------|----------------|--------|
| 404.00                    | 0.5665                   | HOMO->LUMO     | 68.65% |
| 316.32                    | 0.3290                   | HOMO->LUMO+7   | 24.03% |
|                           |                          | HOMO-4->LUMO+1 | 10.86% |
|                           |                          | HOMO-2->LUMO   | 43.27% |
|                           |                          | HOMO-2->LUMO+1 | 11.75% |
|                           |                          | HOMO-1->LUMO+1 | 39.42% |
|                           |                          | HOMO->LUMO+2   | 16.89% |
|                           |                          | HOMO->LUMO+4   | 14.05% |
| 299.11                    | 0.2753                   | HOMO->LUMO+6   | 12.55% |
|                           |                          | HOMO-2->LUMO+1 | 21.34% |
|                           |                          | HOMO-5->LUMO   | 25.57% |
|                           |                          | HOMO-5->LUMO+1 | 11.97% |
|                           |                          | HOMO-4->LUMO   | 45.39% |
|                           |                          | HOMO-4->LUMO+1 | 24.64% |
| 296.59                    | 0.5036                   | HOMO-3->LUMO   | 29.36% |
|                           |                          | HOMO-2->LUMO   | 21.59% |
|                           |                          | HOMO-5->LUMO   | 52.20% |
| 294.04                    | 0.3113                   | HOMO-5->LUMO+1 | 18.78% |
|                           |                          | HOMO-3->LUMO+1 | 63.40% |
|                           |                          | HOMO-5->LUMO   | 23.61% |
|                           |                          | HOMO-5->LUMO+1 | 11.96% |
|                           |                          | HOMO-4->LUMO   | 19.83% |
|                           |                          | HOMO-4->LUMO+1 | 54.16% |
|                           |                          | HOMO-3->LUMO+1 | 11.84% |
| 265.12                    | 0.2773                   | HOMO->LUMO+6   | 13.48% |
|                           |                          | HOMO->LUMO+14  | 14.32% |
|                           |                          | HOMO-7->LUMO   | 64.21% |

## 7. Electrochemical properties

Cyclic voltammograms were recorded with a Metrohm PGSTAT204 electrochemical analyzer using DCM. The CV cell consisted of a gold electrode, a Pt wire counter electrode, and an Ag/AgCl reference electrode. All measurements were performed using DCM solutions of samples with a concentration of 1 mM and 0.1 M  $\text{Bu}_4\text{N}^+\text{BF}_6^-$  as a supporting electrolyte with a scan rate of  $10 \text{ mVs}^{-1}$ . Potentials are determined against a ferrocene/ferrocenyl ion couple ( $\text{Fc}/\text{Fc}^+$ ).

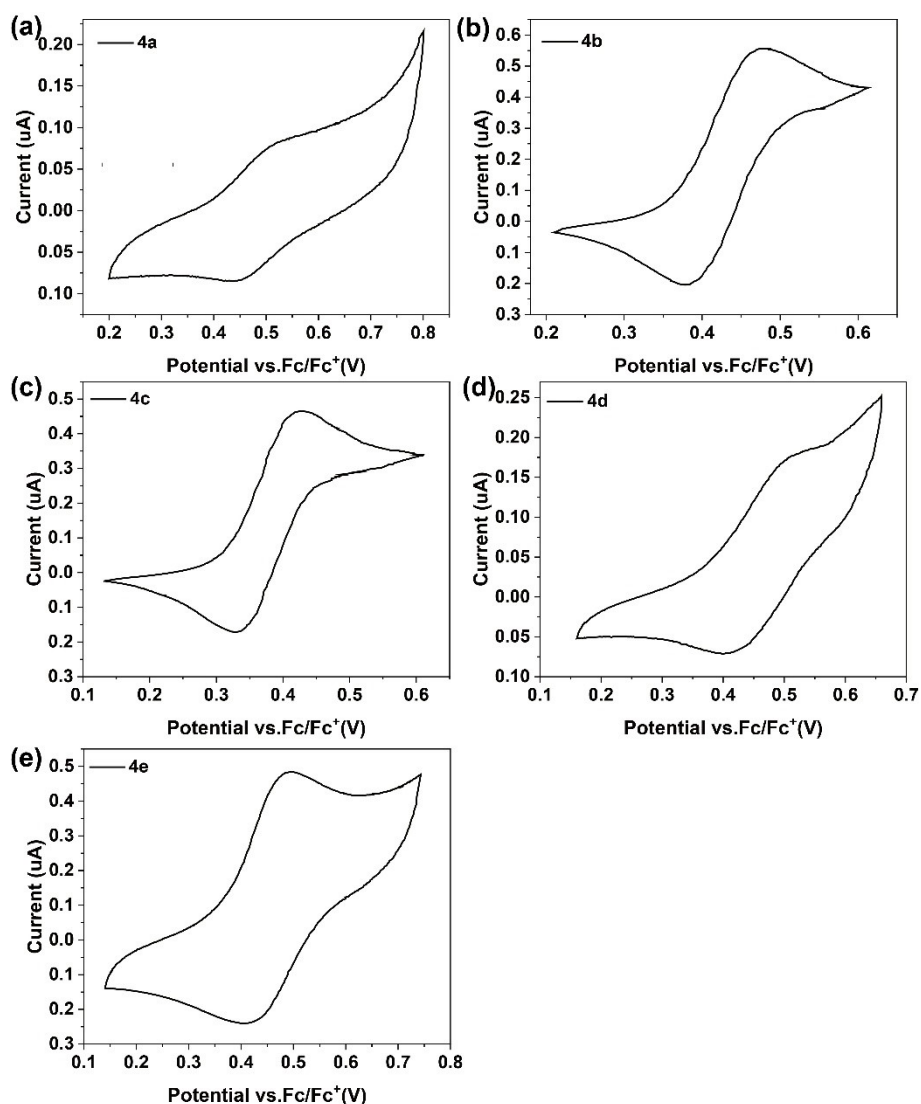

**Figure S23.** Cyclic voltammograms of **4a**, **4b**, **4c**, **4d**, and **4e** in DCM with  $\text{Bu}_4\text{N}^+\text{BF}_6^-$  (0.1 M) as a supporting electrolyte, Fc = ferrocene.

## 8. Comparison of HOMO/LUMO plots

**Table S17** . Electronic properties of **4a**, **4b**, **4c**, **4d**, and **4e**

| Entry     | $E_g^a$ (eV) | $E_{ox}^b$ (V) | LUMO(eV)<br>(Exp) <sup>c</sup> | HOMO(eV)<br>(Exp) <sup>d</sup> | LUMO(eV)<br>(Cal) <sup>e</sup> | HOMO(eV)<br>(Cal) <sup>e</sup> | $E_g$ (eV)<br>(Cal) <sup>e</sup> |
|-----------|--------------|----------------|--------------------------------|--------------------------------|--------------------------------|--------------------------------|----------------------------------|
| <b>4a</b> | 4.84         | 0.42           | -0.38                          | -5.22                          | -0.57                          | -5.65                          | 5.08                             |
| <b>4b</b> | 3.28         | 0.37           | -1.89                          | -5.17                          | -1.85                          | -5.00                          | 3.16                             |
| <b>4c</b> | 3.15         | 0.32           | -1.97                          | -5.12                          | -1.87                          | -5.01                          | 3.14                             |
| <b>4d</b> | 4.18         | 0.38           | -1.00                          | -5.18                          | -0.98                          | -5.44                          | 4.46                             |
| <b>4e</b> | 3.86         | 0.36           | -1.30                          | -5.16                          | -1.27                          | -5.47                          | 4.20                             |

<sup>a</sup>  $E_g$  estimated from the UV-Vis absorption spectra.

<sup>b</sup> Oxidation onset potentials measured by cyclic voltammetry.

<sup>d</sup> HOMO =  $-(E_{ox} + 4.8)$  eV.

<sup>c</sup> LUMO = HOMO +  $E_g$ .

<sup>e</sup>Theoretical calculations have been carried out by using the GAUSSIAN09 suite of programs in gas-phase at the B3LYP/6-31G(d) level<sup>[7]</sup>, respectively.

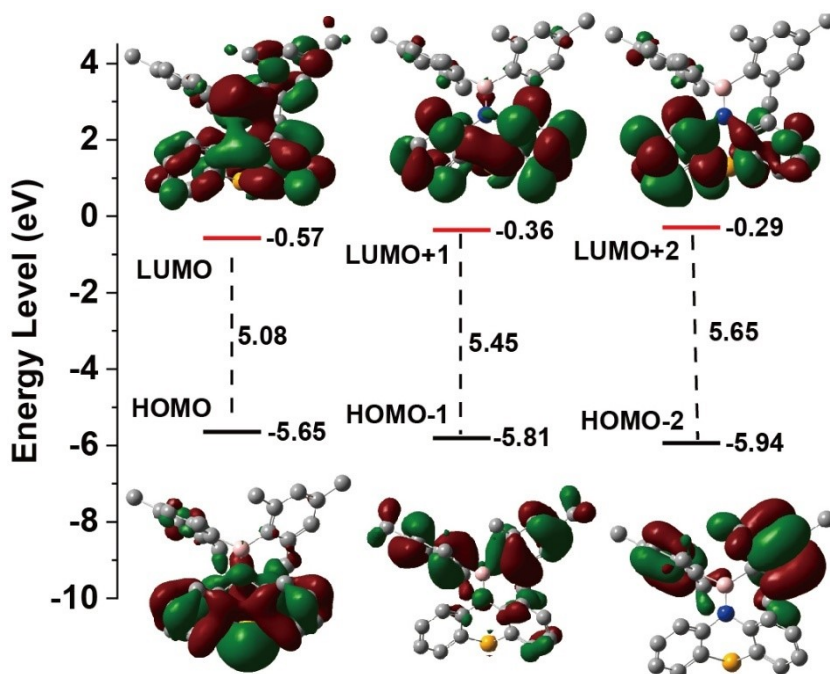

**Figure S24.** Computed molecular orbital plots for **4a**.

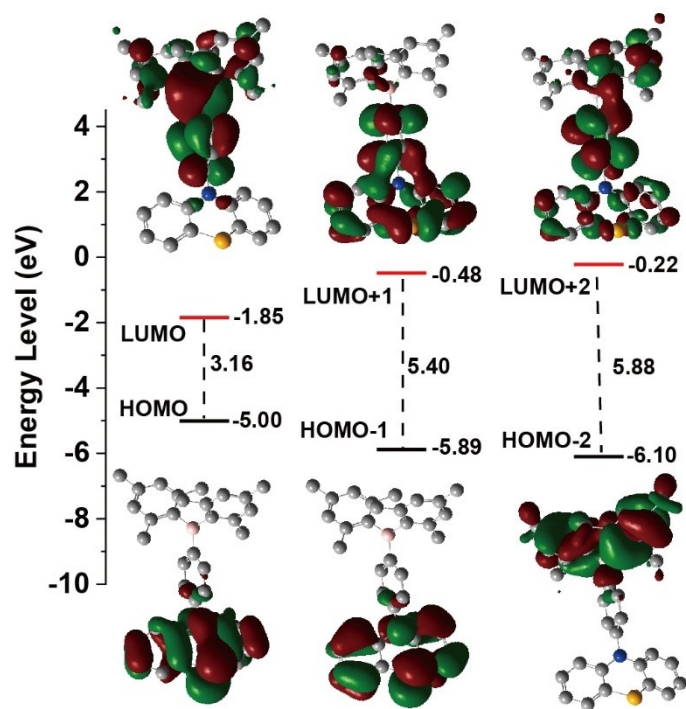

Figure S25. Computed molecular orbital plots for **4b**.

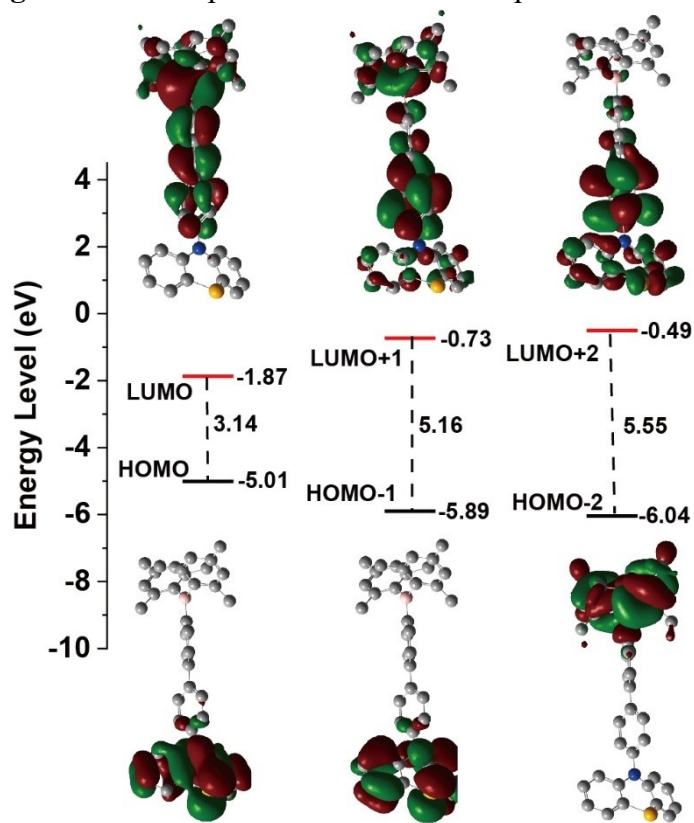

Figure S26. Computed molecular orbital plots for **4c**.

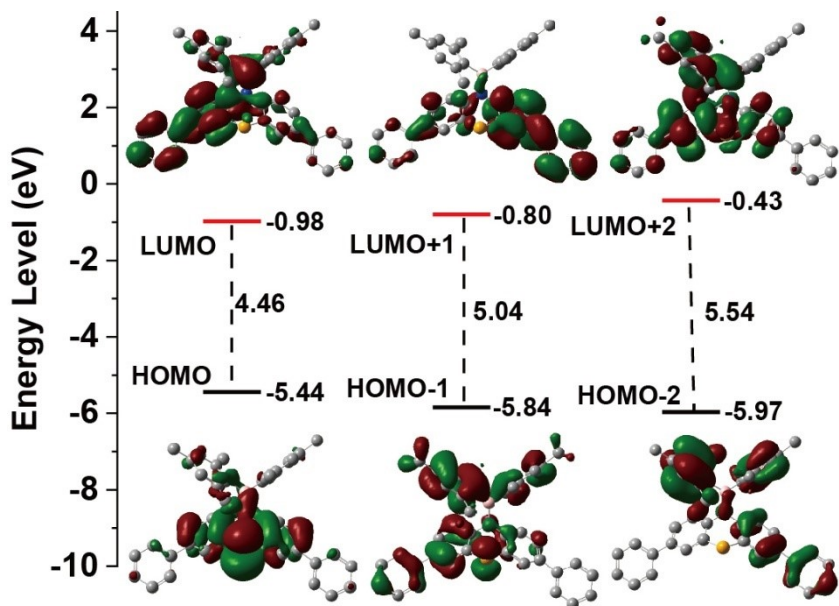

Figure S27. Computed molecular orbital plots for 4d.

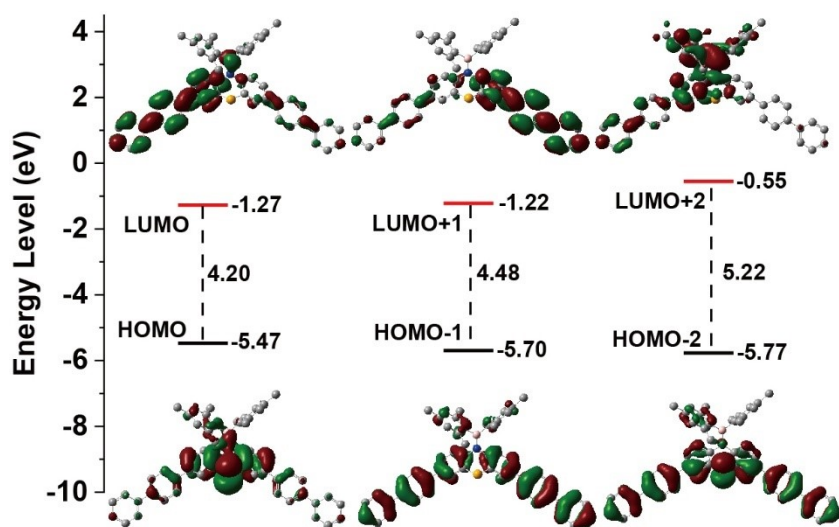

Figure S28. Computed molecular orbital plots for 4e.

## 9. Aggregation-induced fluorescence properties

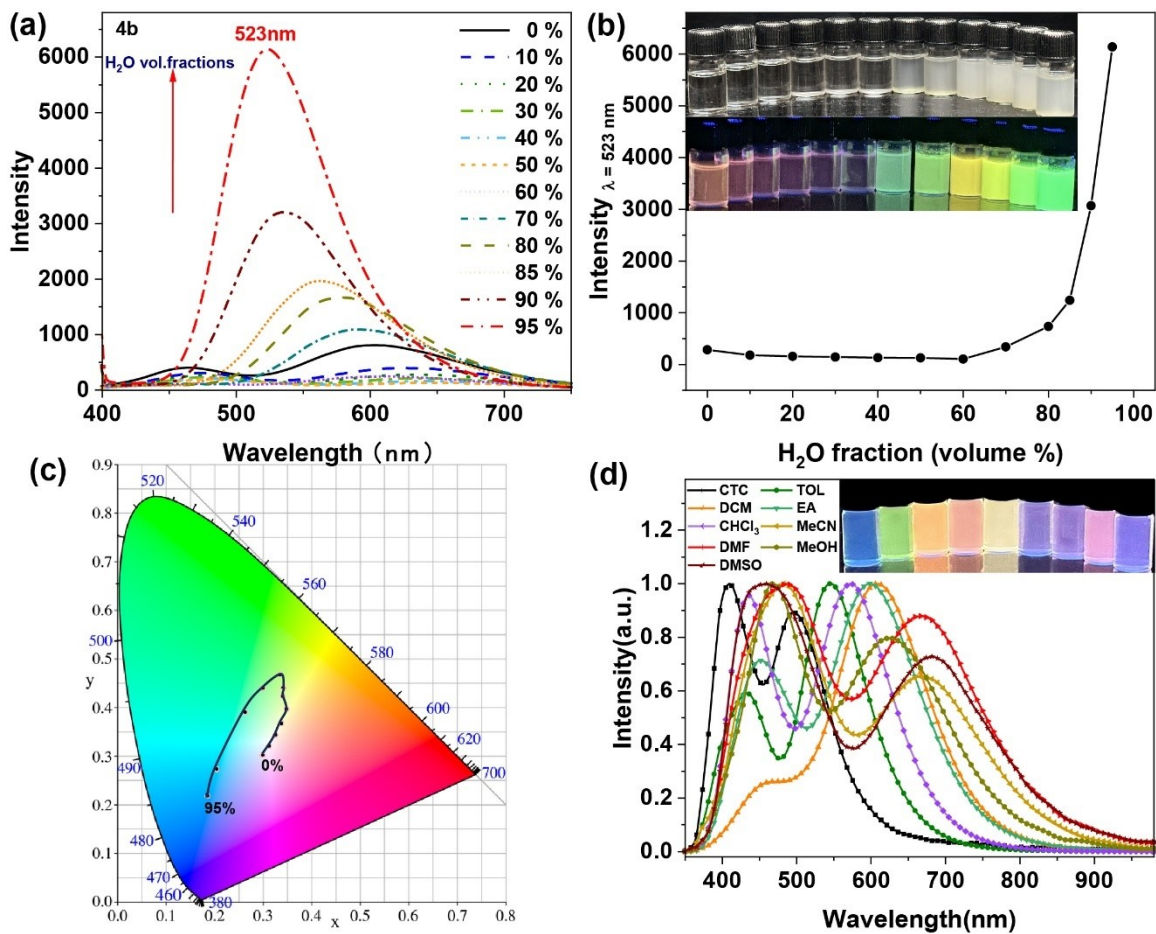

**Figure S29.** Photoluminescence (PL) spectra of **4b** in different THF/water ratios. (a) Photographs of aggregates under UV light,  $\lambda_{\text{ex}} = 365 \text{ nm}$ . (b) Emission intensity of **4b** as the THF/water ratio is altered (fluorescence intensity at 523 nm). (c) CIE chromaticity. (d) Emission spectra of **4b** in solutions (with different polarities).

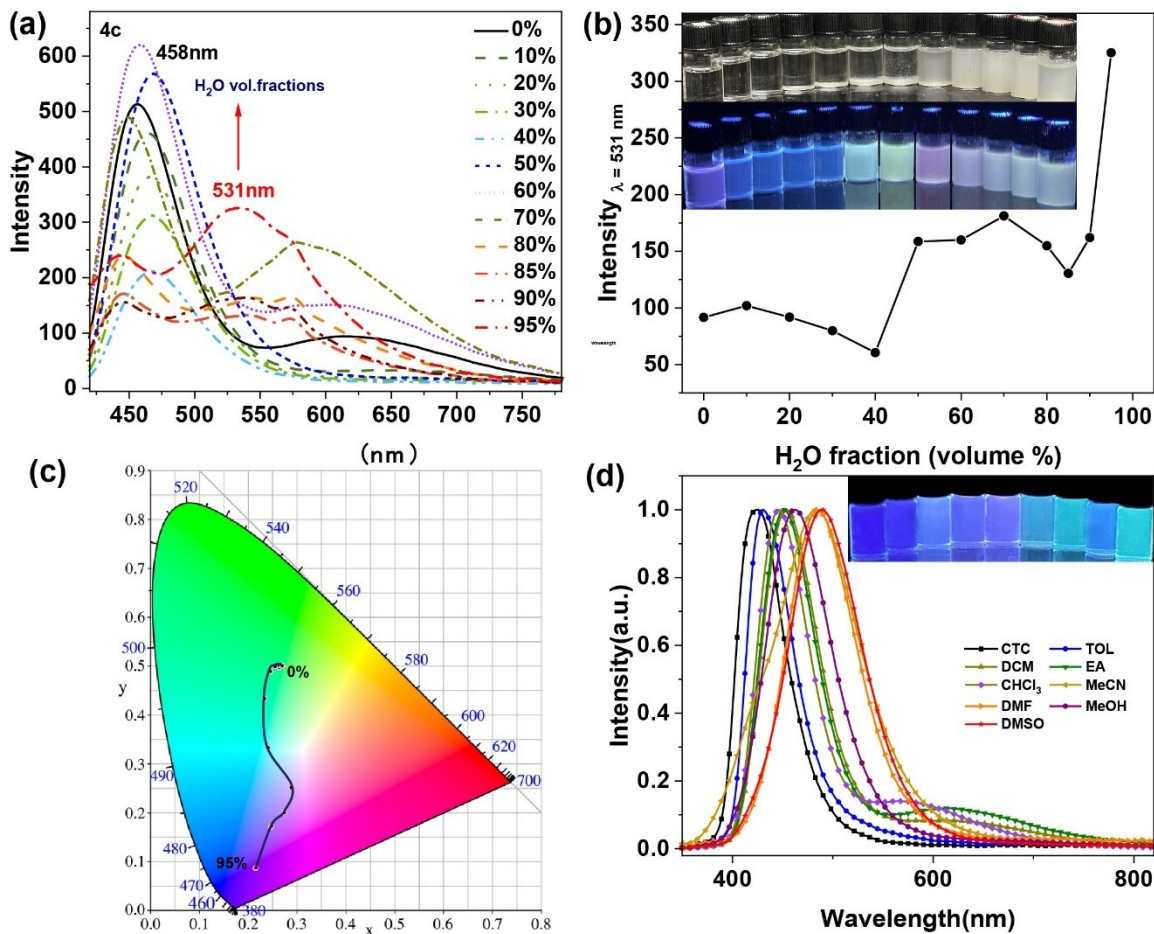

**Figure S30.** Photoluminescence (PL) spectra of 4b in different THF/water ratios. (a) Photographs of aggregates under UV light,  $\lambda_{ex} = 365$  nm. (b) Emission intensity of 4c as the THF/water ratio is altered (fluorescence intensity at 523 nm). (c) CIE chromaticity. (d) Emission spectra of 4c in solutions (with different polarities).

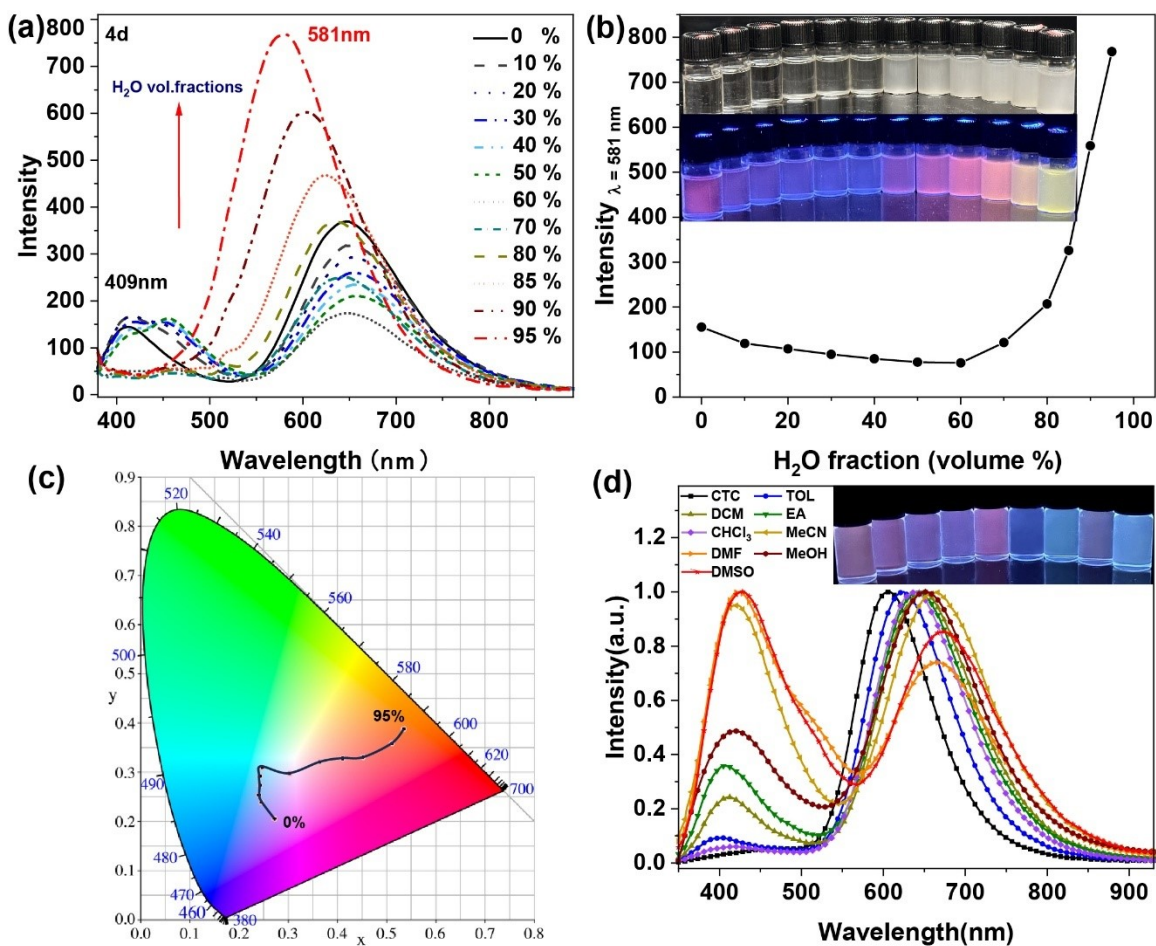

**Figure S31.** Photoluminescence (PL) spectra of **4b** in different THF/water ratios. (a) Photographs of aggregates under UV light,  $\lambda_{\text{ex}} = 365 \text{ nm}$ . (b) Emission intensity of **4d** as the THF/water ratio is altered (fluorescence intensity at 523 nm). (c) CIE chromaticity. (d) Emission spectra of **4d** in solutions (with different polarities).

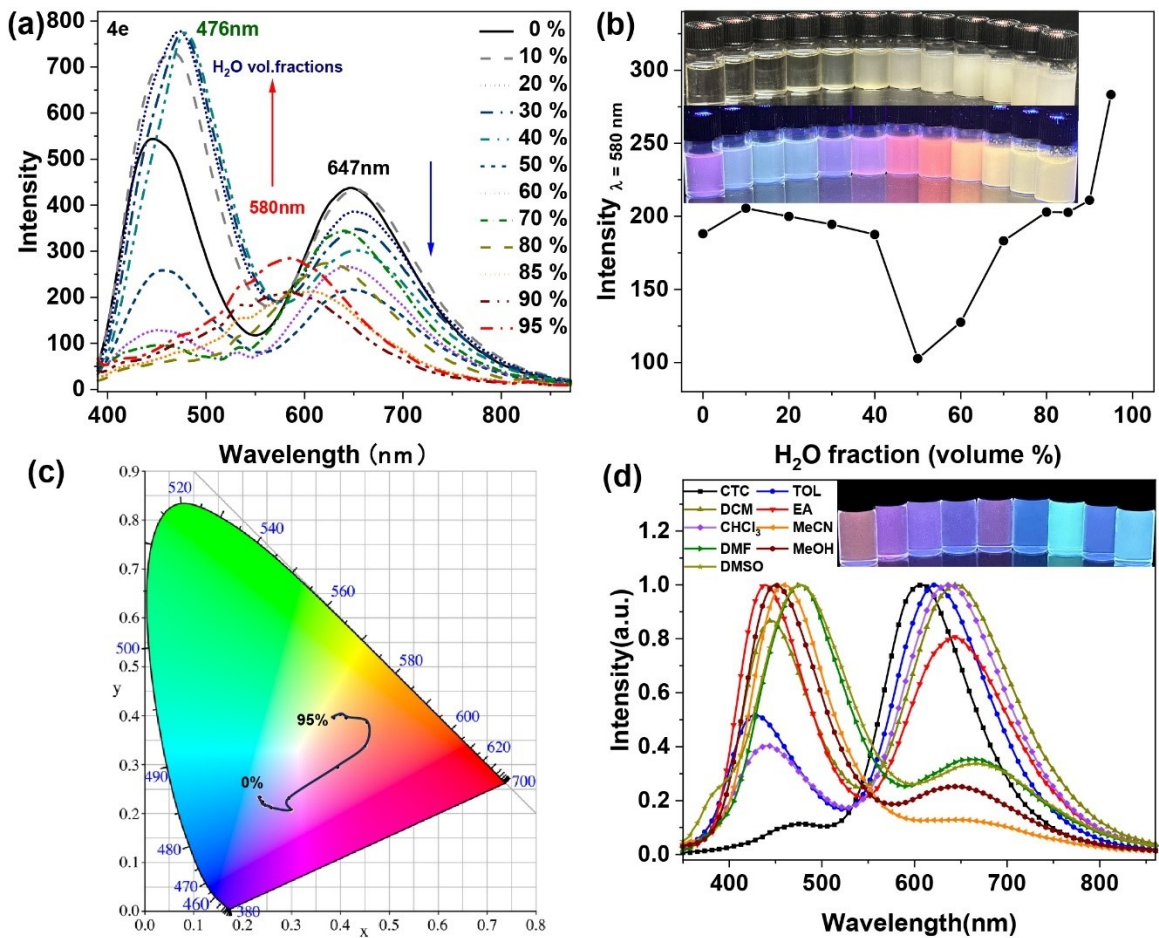

**Figure S32.** Photoluminescence (PL) spectra of **4b** in different THF/water ratios. (a) Photographs of aggregates under UV light,  $\lambda_{\text{ex}} = 365 \text{ nm}$ . (b) Emission intensity of **4e** as the THF/water ratio is altered (fluorescence intensity at 523 nm). (c) CIE chromaticity. (d) Emission spectra of **4e** in solutions (with different polarities).

## 10. Determination of the detection limit

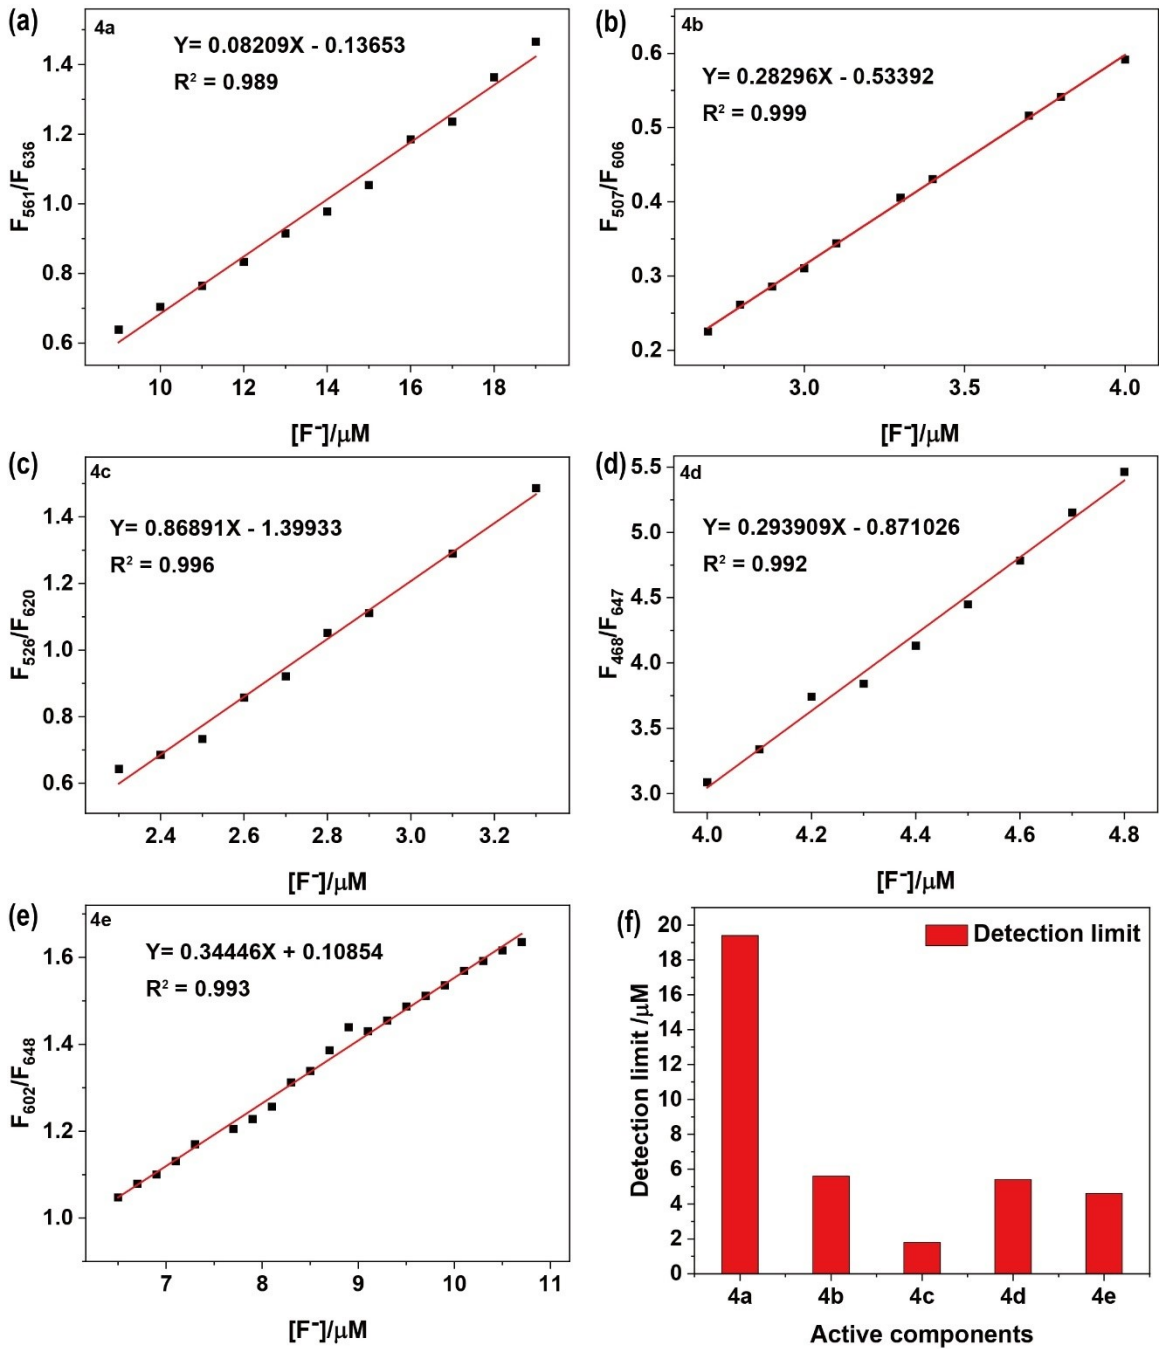

**Figure S33.** The calibration curves and linear equation for FL intensity and concentration of  $F^-$  and the calculated detection limits of **4a**, **4b**, **4c**, **4d**, and **4e**.

## 11. Electrochromism of 4a in solution and film applied potentials.

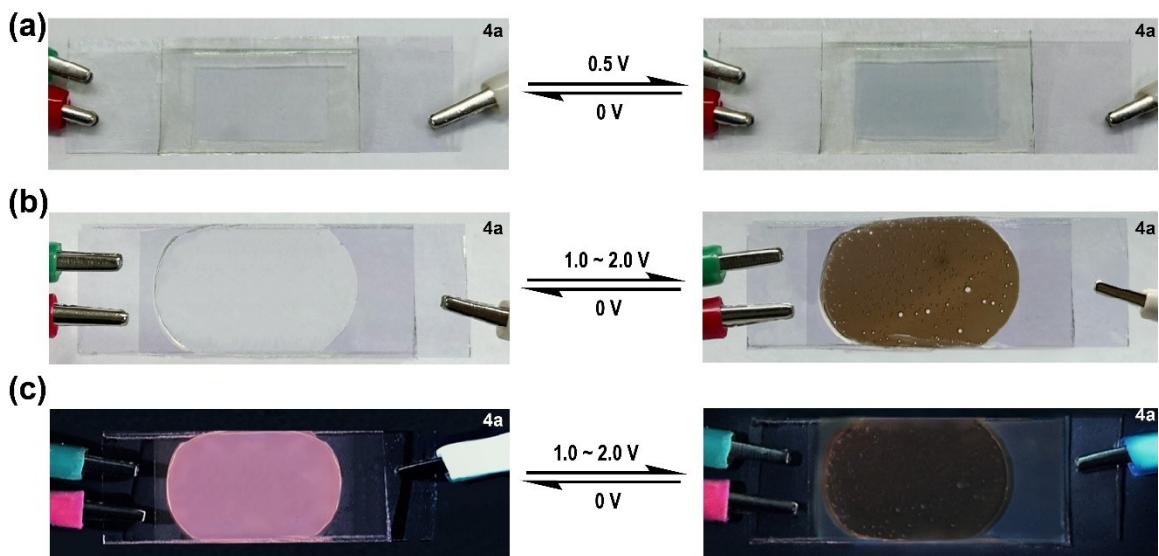

**Figure S34.** (a) Photos of ECDs with **4a** in DMF solution applied potentials; Photos of ECDs with **4a** in film assemble by polycaprolactone (PCL) applied potentials under daylight lamp (b) and UV illumination (c).

## 12. optical stability test for electrochromic switching of 4a, 4d, and 4e.

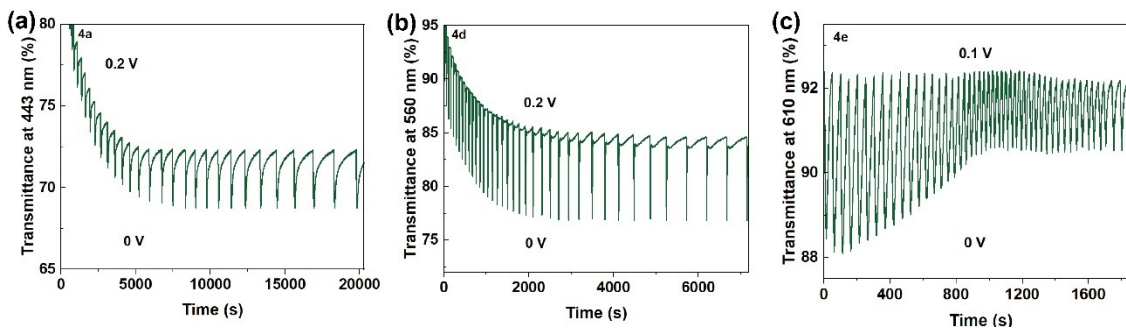

**Figure S35.** Optical stability test for electrochromic switching of **4a**, **4c**, and **4d**

### 13. Fluorescence spectral changes of 4a, 4d, and 4e film applied potentials.

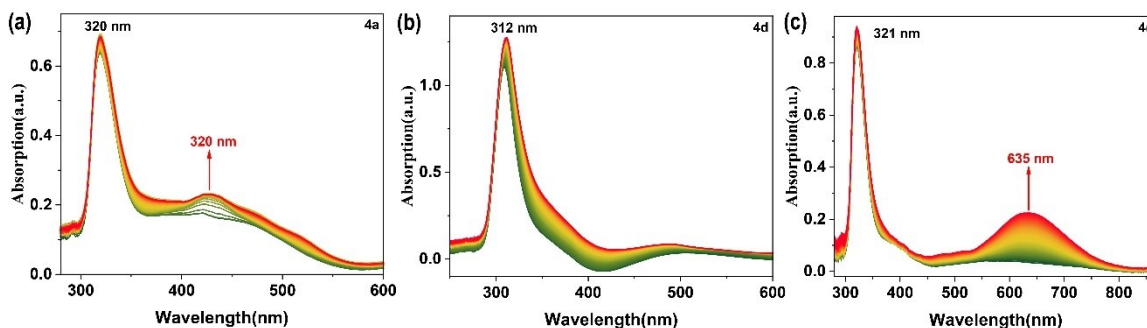

**Figure S36.** The UV/vis absorption spectral changes of 4a, 4d, and 4e applied potentials in the film.

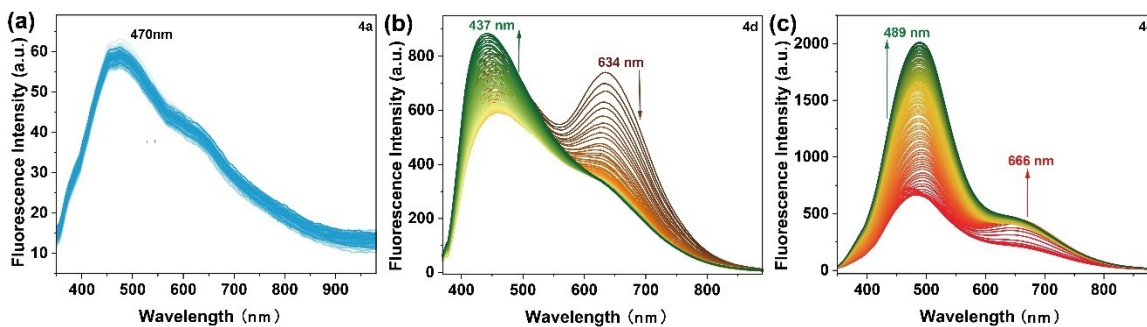

**Figure S37.** Fluorescence spectral changes of 4a, 4d, and 4e applied potentials in the film.

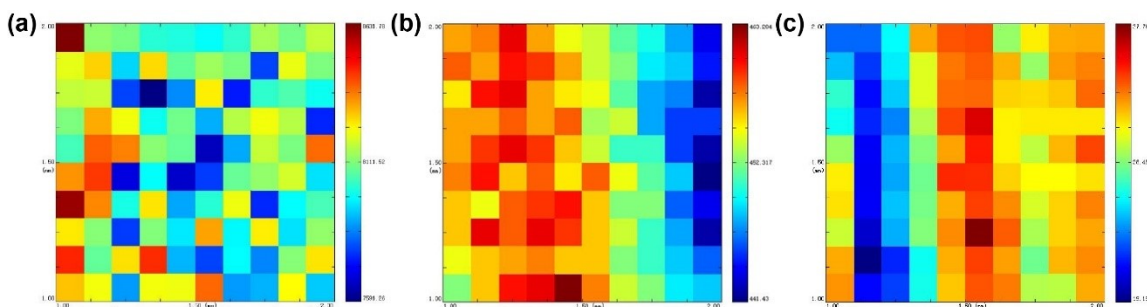

**Figure S38.** The two-dimensional diagram of 4a, 4d, and 4e in the film.

## 14. $^1\text{H}$ NMR and $^{13}\text{C}$ NMR spectra

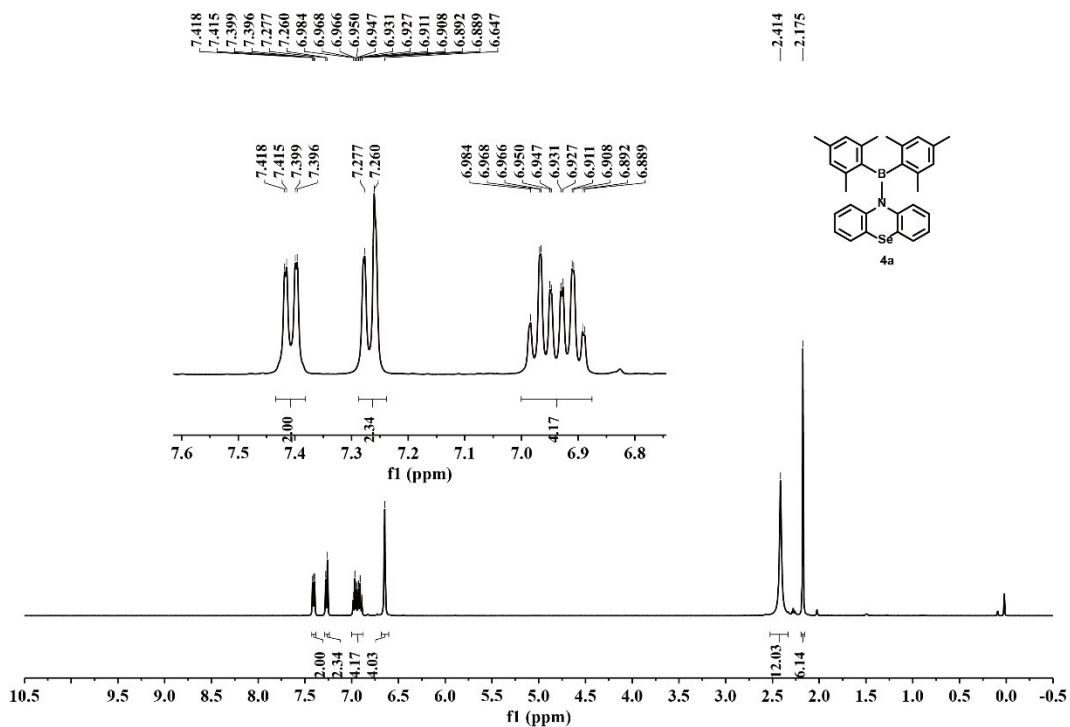

$^1\text{H}$  NMR spectrum of **4a** in  $\text{CDCl}_3$

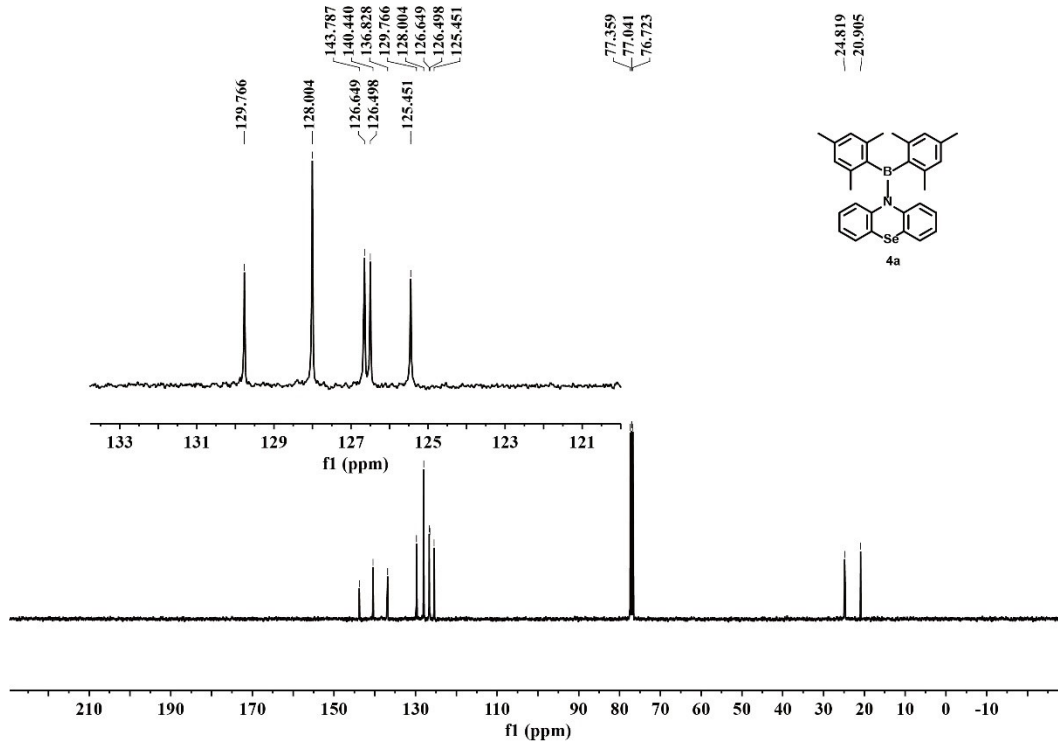

$^{13}\text{C}$  NMR spectrum of **4a** in  $\text{CDCl}_3$

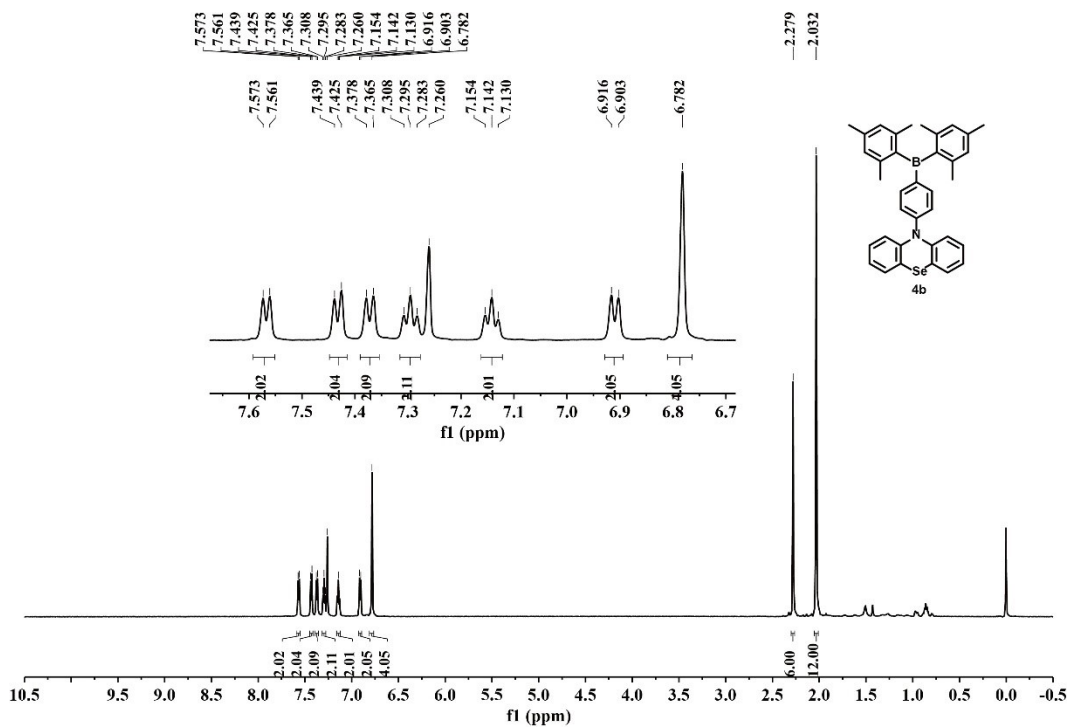

<sup>1</sup>H NMR spectrum of **4b** in CDCl<sub>3</sub>

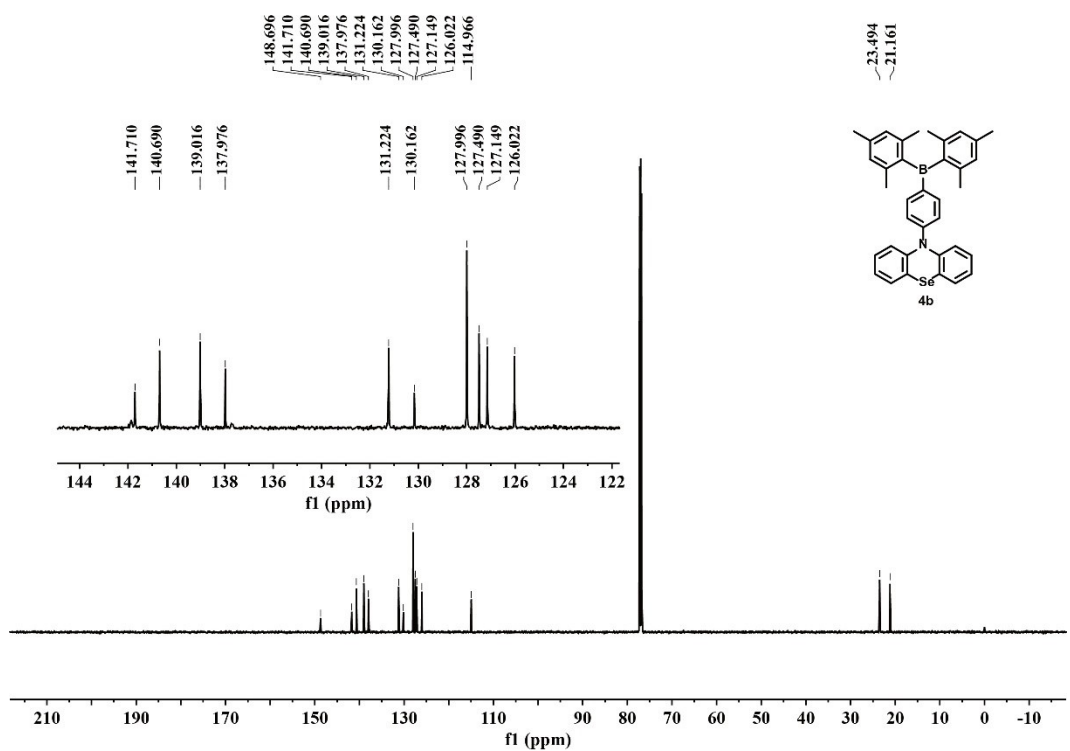

<sup>13</sup>C NMR spectrum of **4b** in CDCl<sub>3</sub>

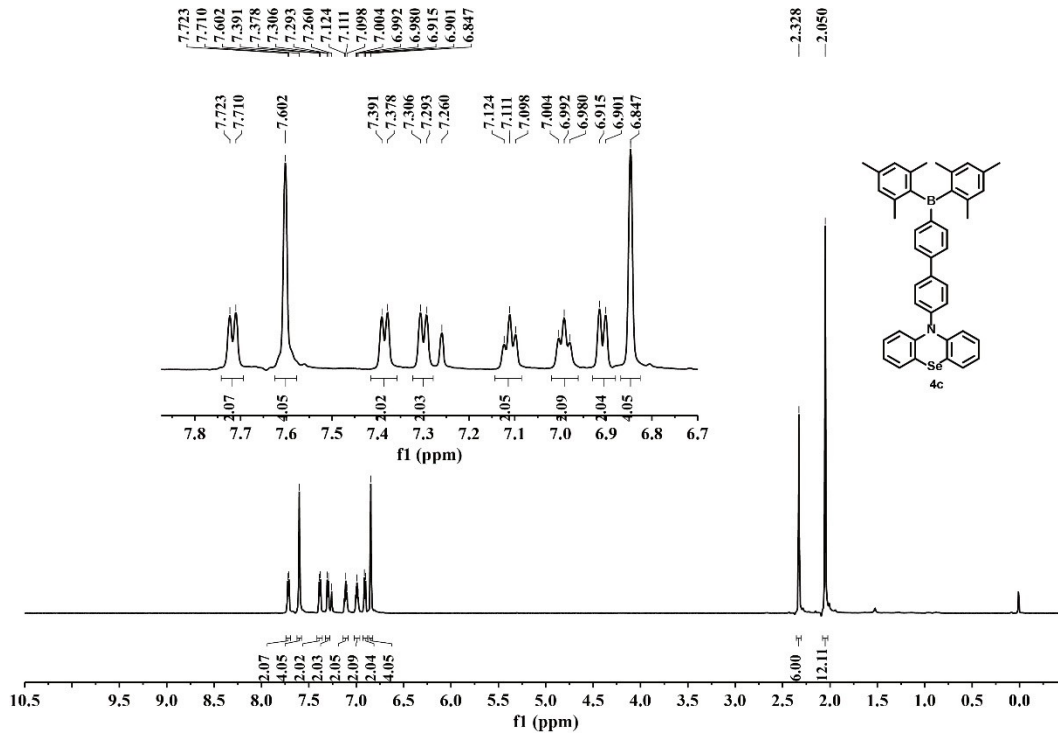

<sup>1</sup>H NMR spectrum of **4c** in CDCl<sub>3</sub>

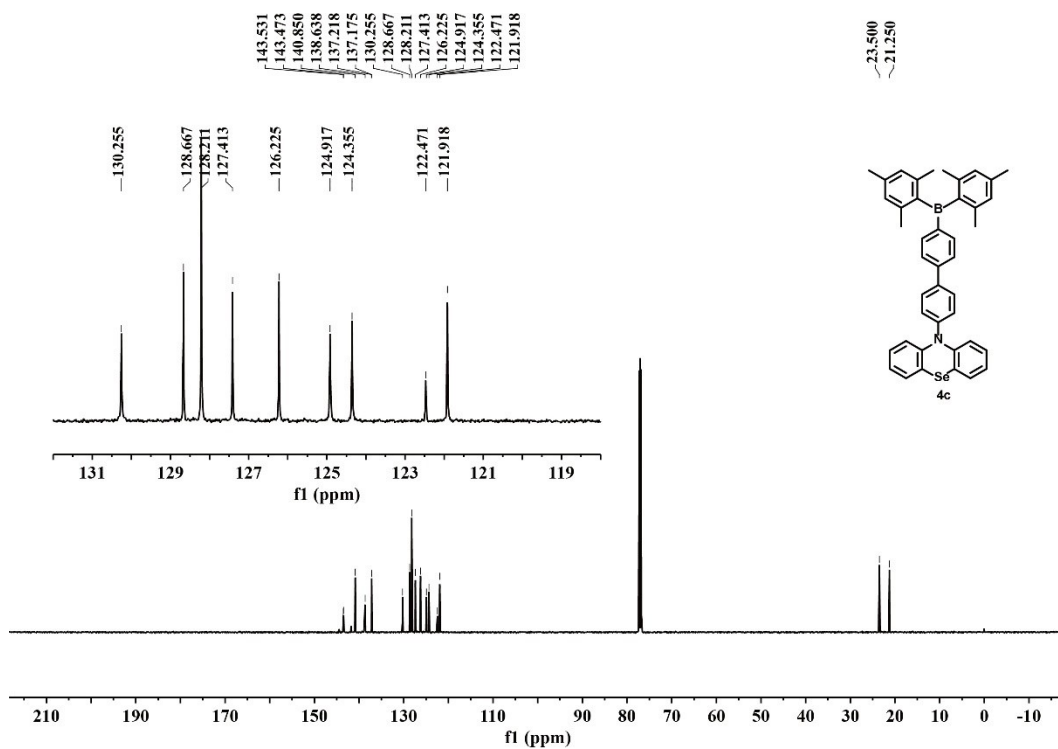

<sup>13</sup>C NMR spectrum of **4c** in CDCl<sub>3</sub>



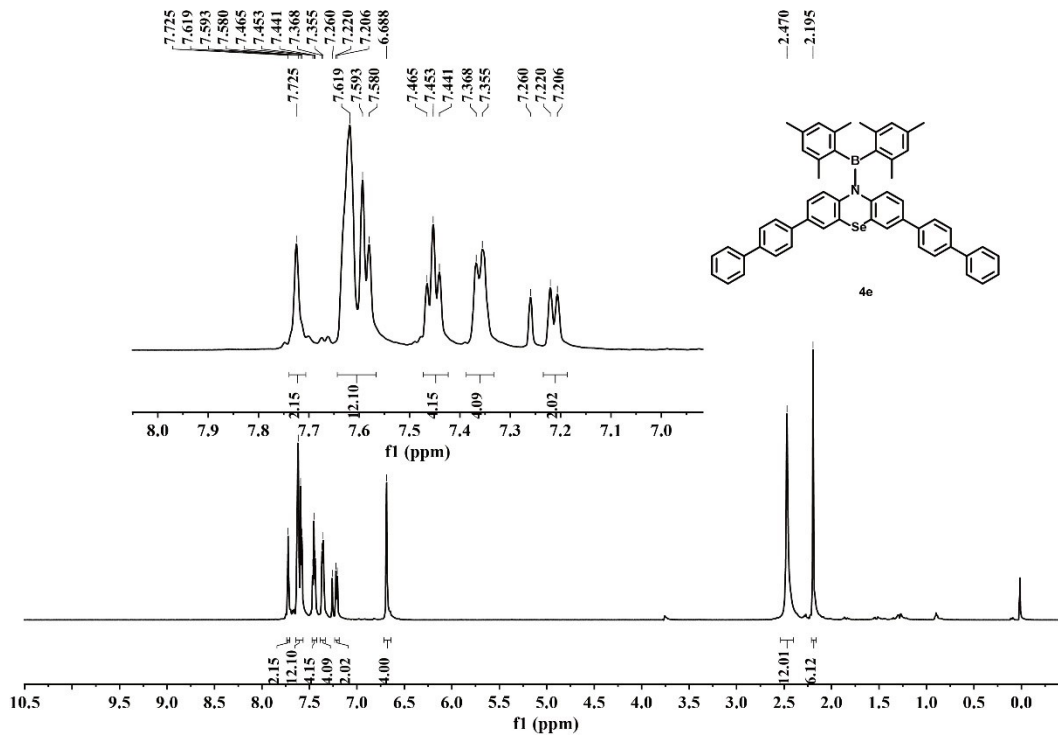

<sup>1</sup>H NMR spectrum of **4e** in CDCl<sub>3</sub>

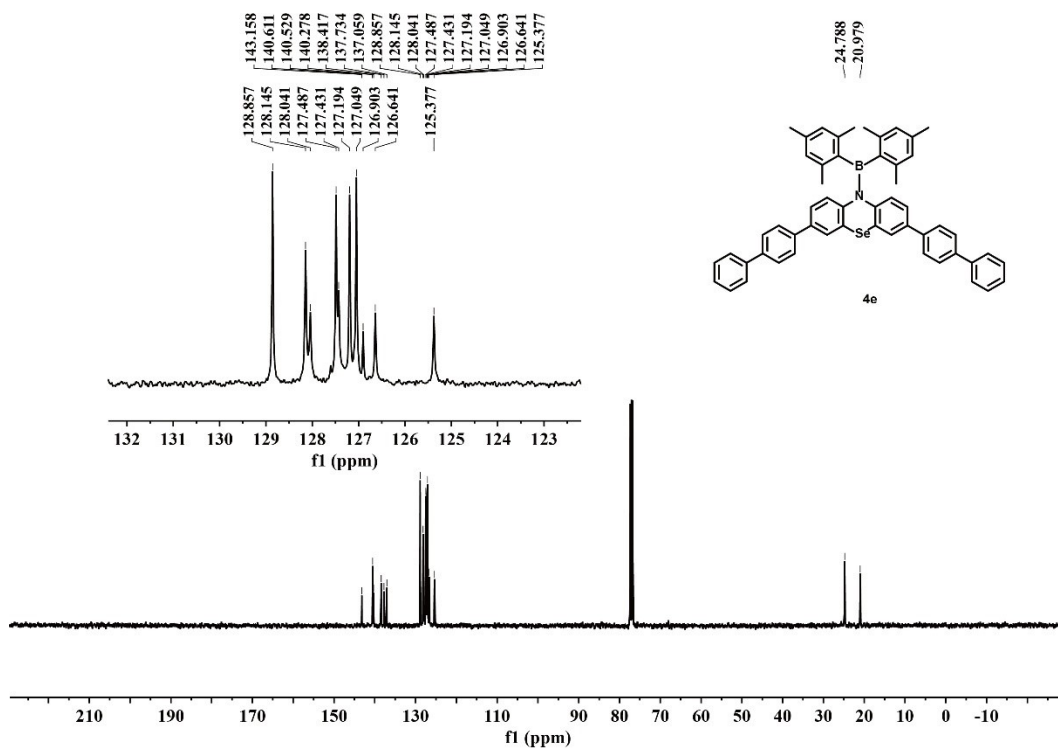

<sup>13</sup>C NMR spectrum of **4e** in CDCl<sub>3</sub>

## 15. HRMS spectra

G:\2025\...20250613\Z11\_250613143148

06/13/25 14:33:36

Z11\_250613143148 #934 RT: 6.26 AV: 1 NL: 1.98E4  
T: FTMS + p APCI corona Full ms [400.0000-1100.0000]

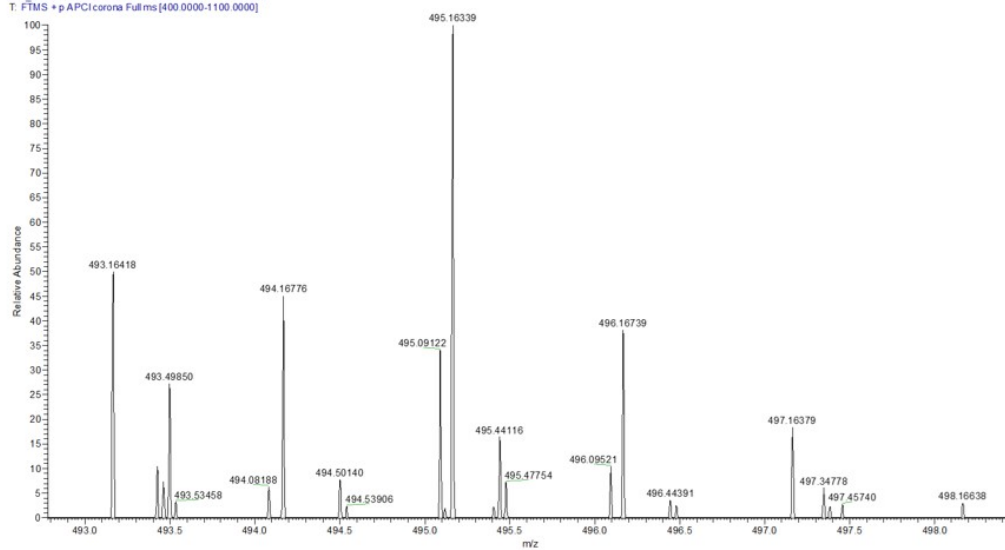

HRMS of 4a

G:\2025\...20250613\Z14\_250613151022

06/13/25 15:12:41

Z14\_250613151022 #552 RT: 3.66 AV: 1 NL: 3.90E6  
T: FTMS + p APCI corona Full ms [400.0000-1100.0000]

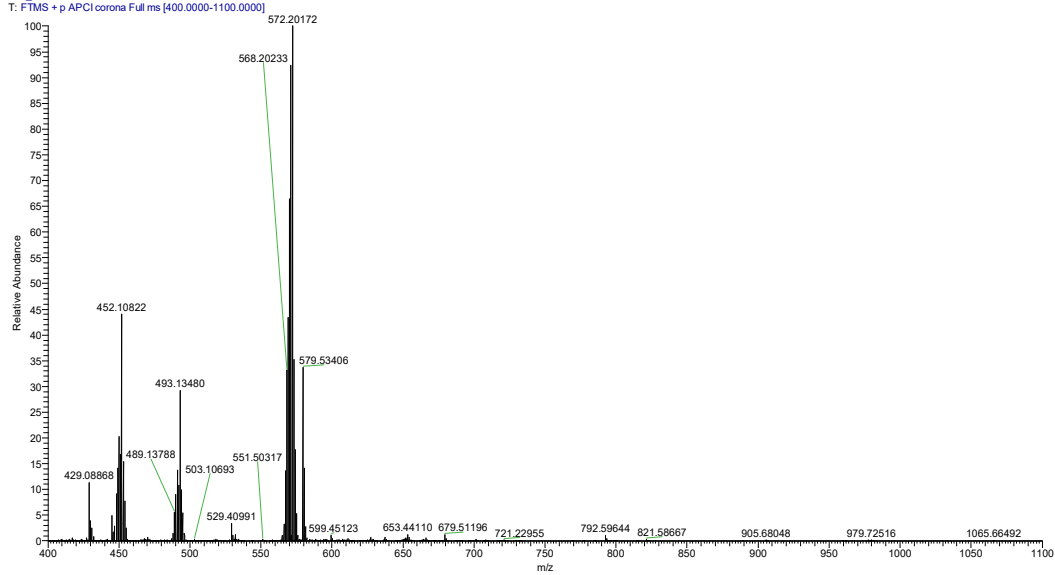

HRMS of 4b

Z15\_250613152249 #878 RT: 5.85 AV: 1 NL: 2.20E6  
T: FTMS + p APCI corona Full ms [400.0000-1100.0000]

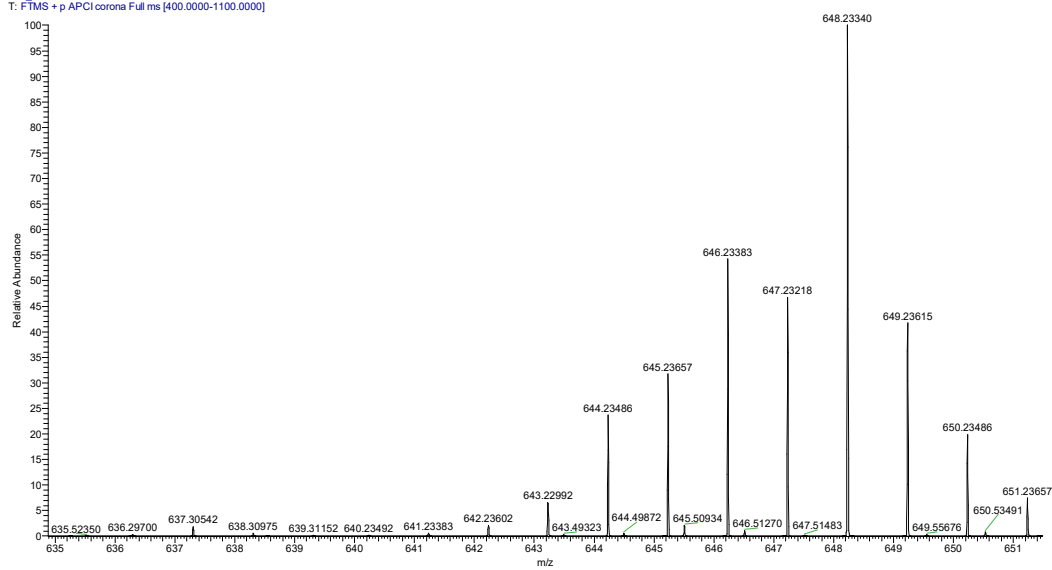

HRMS of 4c

Z12\_250613144523 #553 RT: 3.56 AV: 1 NL: 1.53E7  
T: FTMS + p APCI corona Full ms [400.0000-1100.0000]

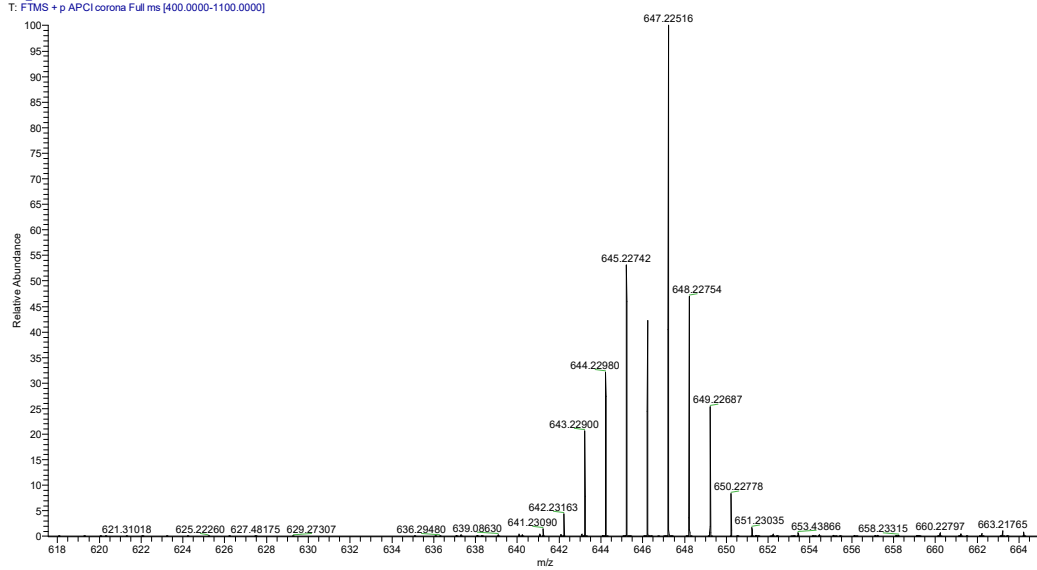

HRMS of 4d

Z13\_250613145756 #956 RT: 6.38 AV: 1 NL: 2.13E6  
T: FTMS + p.APCI corona Full ms [400.0000-1100.0000]

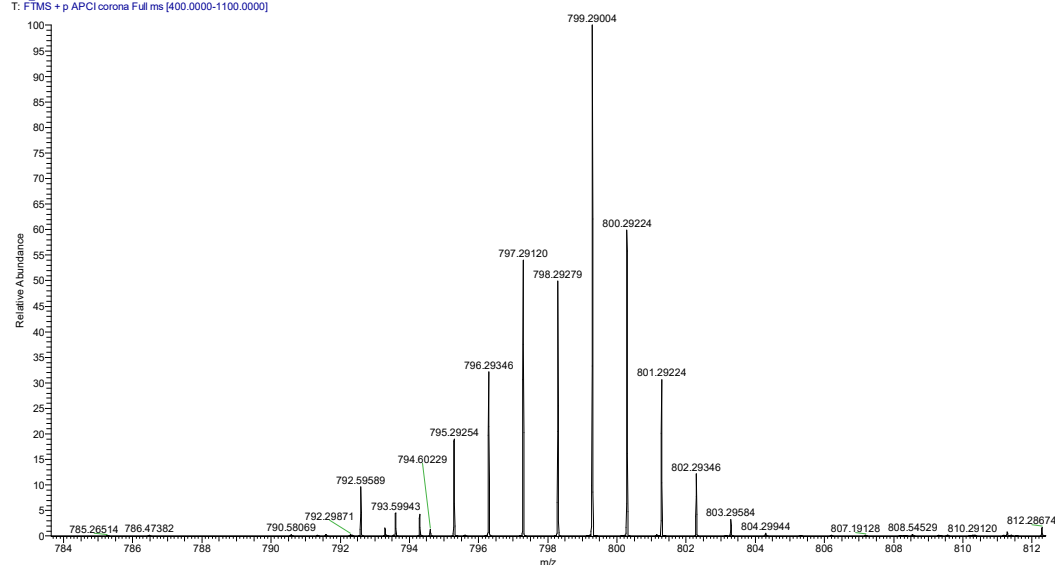

HRMS of 4e

## 16. Reference

- [1] X. Cao, K. Pan, J. Miao, X. Lv, Z. Huang, F. Ni, X. Yin, Y. Wei, C. Yang, *J. Am. Chem. Soc.*, 2022, **144**, 22976-22984.
- [2] Z. Zhang, B. Zhang, X. Han, H. Chen, C. Xue, M. Peng, G. Ma, Y. Ren, *Chem. Sci.*, 2023, **14**, 2990-2998.
- [3] C. J. Cramer, D. G. Truhlar, *Chem. Rev.*, 1999, **99**, 2161-2200.
- [4] R. Cammi, J. Tomasi, *J. Comput. Chem.*, 1995, **16**, 1449-1458.
- [5] J. Tomasi, M. Persico, *Chem. Rev.*, 1994, **94**, 2027-2094.
- [6] S. Miertuš, E. Scrocco, J. Tomasi, *Chem. Phys.*, 1981, **55**, 117-129.
- [7] M. Frisch, *Inc, Wallingford CT*. 2009, **201**.
